1 **Title**

2 Multi-omics reveal intricate network of mitochondrial adaptations to training in human  
3 skeletal muscle

4 **Authors**

5 Cesare Granata<sup>1,2,†,\*</sup>, Nikeisha J. Caruana<sup>2,3,†</sup>, Javier Botella<sup>2</sup>, Nicholas A. Jamnick<sup>2,4</sup>, Kevin  
6 Huynh<sup>5</sup>, Jujiao Kuang<sup>2</sup>, Hans A. Janssen<sup>2</sup>, Boris Reljic<sup>3,6</sup>, Natalie A. Mellett<sup>5</sup>, Adrienne  
7 Laskowski<sup>1,7</sup>, Tegan L. Stait<sup>7</sup>, Ann E. Frazier<sup>7,8</sup>, Melinda T. Coughlan<sup>1,9</sup>, Peter J. Meikle<sup>5</sup>,  
8 David R. Thorburn<sup>7,8,10</sup>, David A. Stroud<sup>3,‡,\*</sup> and David J. Bishop<sup>2,‡,\*</sup>

9 **Affiliations**

10 <sup>1</sup>Department of Diabetes, Central Clinical School, Monash University, Melbourne, VIC,  
11 3004, Australia

12 <sup>2</sup>Institute for Health and Sport (IHES), Victoria University, Melbourne, VIC, 3011, Australia

13 <sup>3</sup>Department of Biochemistry and Pharmacology and Bio21 Molecular Science and  
14 Biotechnology Institute, The University of Melbourne, Parkville, VIC, 3010, Australia

15 <sup>4</sup>Metabolic Research Unit, School of Medicine and Institute for Mental and Physical Health  
16 and Clinical Translation (iMPACT), Deakin University, Geelong, VIC, Australia

17 <sup>5</sup>Metabolomics Laboratory, Baker Heart & Diabetes Institute, Melbourne, VIC, 3004,  
18 Australia

19 <sup>6</sup>Current address: Department of Biochemistry and Molecular Biology, Monash Biomedicine  
20 Discovery Institute, Monash University, 3800, Melbourne, Australia.

21 <sup>7</sup>Murdoch Children's Research Institute, Royal Children's Hospital, Melbourne, VIC, 3052,  
22 Australia

23 <sup>8</sup>Department of Paediatrics, The University of Melbourne, Melbourne, VIC, 3052, Australia

24 <sup>9</sup>Baker Heart & Diabetes Institute, Melbourne, VIC, 3004, Australia

25 <sup>10</sup>Victorian Clinical Genetics Services, Royal Children's Hospital, Melbourne, VIC, 3052,

26 Australia

27 †Equal contribution

28 ‡Equal contribution and lead contacts

29 \***Correspondence:** [cesare.granata@monash.edu](mailto:cesare.granata@monash.edu) (C.G.), [david.stroud@unimelb.edu.au](mailto:david.stroud@unimelb.edu.au)

30 (D.A.S), [david.bishop@vu.edu.au](mailto:david.bishop@vu.edu.au) (D.J.B)

31 **Abstract**

32 Defects in mitochondria have been implicated in multiple diseases and aging; therefore,  
33 interventions able to counteract these changes can improve quality of life. Exercise training is  
34 a readily accessible and inexpensive therapeutic intervention; however, the complexity of  
35 training-induced mitochondrial adaptations in skeletal muscle remains poorly understood.  
36 Here, we describe an intricate and previously undemonstrated network of differentially  
37 prioritised training-induced adaptations in human skeletal muscle mitochondria. We show  
38 that changes in hundreds of transcripts, proteins, and lipids are not stoichiometrically linked  
39 to the increase in mitochondrial content. Moreover, we demonstrate a prioritisation of  
40 specific mitochondrial functional protein networks at different stages of the training  
41 intervention, including an initial deprioritisation of oxidative phosphorylation (OXPHOS)  
42 and a prioritisation of TCA cycle and fatty acid  $\beta$ -oxidation linked mitochondrial respiration.  
43 This indicates that enhancing electron flow to OXPHOS may be more important to improve  
44 ATP generation in skeletal muscle than increasing the abundance of the OXPHOS  
45 machinery. Our research unearths the elaborate and multi-layered nature of the adaptive  
46 response to exercise and provides a valuable resource that can be mined to maximise the  
47 therapeutic benefits of exercise.

48 **Key Words:** mitochondrial biogenesis, mitochondrial proteome, OXPHOS, supercomplex,  
49 lipidome, transcriptome, mitochondrial respiration, electron transport chain.

## 50 **Introduction**

51 Mitochondria are the main site of energy conversion in the cell and have critical roles in other  
52 important biological processes<sup>1</sup>. Owing to this, defects in mitochondria have been implicated  
53 in multiple diseases, medical conditions, and aging<sup>2-5</sup>. The development of interventions to  
54 improve the content and function of mitochondria is therefore essential to enhance quality of  
55 life and to extend life expectancy.

56 Exercise training is one of the most widely accessible interventions or “therapies” to  
57 stimulate mitochondrial biogenesis<sup>6,7</sup>. As arguably the most extensive and also natural  
58 perturbation, exercise is also an excellent experimental model for understanding both the  
59 complex nature of mitochondrial biogenesis and the plasticity of the mitochondrial proteome  
60 in humans, which consists of more than 1300 proteins<sup>8</sup>. It is well accepted that exercise  
61 training induces an increase in mitochondrial content and respiratory function in skeletal  
62 muscle<sup>9</sup>. However, our knowledge of training-induced mitochondrial adaptations in human  
63 skeletal muscle is limited to a small fraction of the mitochondrial proteome<sup>10</sup>, and there  
64 remain major gaps in our understanding of the magnitude, timing, and direction of change in  
65 individual mitochondrial proteins and related functional pathways.

66 A key biological function of mitochondria is energy conversion via oxidative  
67 phosphorylation (OXPHOS), which is carried out by the four multi-protein complexes  
68 (complexes I to IV [CI-CIV]) of the electron transport chain (ETC) and F<sub>0</sub>F<sub>1</sub>-ATP synthase  
69 (or CV)<sup>11</sup>. Assembly of the OXPHOS complexes is an intricate process requiring the  
70 coordination of two genomes (nuclear and mitochondrial) and chaperone-like proteins known  
71 as assembly factors<sup>12</sup>. Only two studies have investigated training-induced changes in  
72 OXPHOS complexes<sup>13,14</sup>, reporting that exercise differentially modulates the respiratory  
73 complexes and that these changes are not always stoichiometric. Furthermore, no study has

74 investigated if training-induced changes in chaperones, assembly factors, and single  
75 OXPHOS subunits occur in conjunction with, or precede, changes in the complete, functional  
76 complexes. Many other processes support assembly and maintenance of the OXPHOS  
77 complexes, including mitochondrial protein import and assembly pathways, mitochondrial  
78 DNA transcription and translation, metabolite carriers, and pathways producing critical  
79 cofactors such as coenzyme Q and iron-sulphur proteins (Fe-S)<sup>12</sup>. In turn, these processes are  
80 reliant on pathways supporting mitochondrial biogenesis more broadly, such as lipid  
81 biogenesis and maintenance of mitochondrial morphology. Whether these processes and  
82 pathways are activated by exercise training and at which specific times remains unknown.  
83 Moreover, whether these are affected by different training volumes, a key determinant of  
84 training-induced mitochondrial adaptations<sup>9</sup>, is also unclear.

85 Here we apply quantitative multi-omics (transcriptomics, proteomics, and lipidomics), as  
86 well as bioinformatics and biochemical approaches, with a sequential exercise intervention  
87 that included three different training volumes, to investigate changes within the mitochondrial  
88 proteome in human skeletal muscle. We report a general increase in the expression of  
89 hundreds of mitochondrial genes, proteins, and lipids that peak following the highest volume  
90 of training, and which was linked with enhanced mitochondrial respiratory function and  
91 supercomplex (SC) formation. A reduction in training volume led to minimal or no changes  
92 in most measurements. Using biochemical and *in silico* normalisation we removed the bias  
93 arising from the overall increase in mitochondrial content following training, enabling us to  
94 observe novel and divergent adaptations in the mitochondrial transcriptome, proteome, and  
95 lipidome that were independent of changes in overall mitochondrial content. We identified  
96 almost 200 mitochondrial proteins and multiple bioenergetic, OXPHOS, and metabolic  
97 pathways that were differentially regulated following changes in training volume. Our study  
98 demonstrates an intricate and timely mitochondrial remodelling, expanding our fundamental

99 understanding of the steps required for training-induced mitochondrial biogenesis and leading  
100 to new hypotheses regarding how training alters mitochondrial protein content and function  
101 with implications for both health and disease.

## 102 **Results**

### 103 *Increases in mitochondrial content underlie changes in supercomplex abundance and*

### 104 *mitochondrial respiratory function following training.* The traditional view of

105 mitochondrial biogenesis proposes that an increase in mitochondrial content is required to

106 increase mitochondrial function, and that there is a fixed stoichiometry between changes in

107 mitochondrial content and individual mitochondrial proteins. Although this has been

108 questioned before<sup>15</sup>, it remains an unresolved matter. As we have previously reported a

109 correlation between training volume and increases in mitochondrial content<sup>9,16-18</sup>, we

110 employed an experimental model in which ten men were sequentially exposed to different

111 volumes (normal- [NVT], high- [HVT] and reduced- [RVT] volume training) of high-

112 intensity interval training (HIIT) to further interrogate this paradigm (Fig. 1a). An important

113 feature was the RVT phase, which was designed to maintain previously gained mitochondrial

114 adaptations while reducing fatigue (referred to as tapering). A greater weekly training volume

115 was completed during the HVT phase when compared to both the NVT and RVT phases, and

116 also during RVT when compared to NVT (Fig. 1b). Changes in physiological and

117 performance parameters are presented in Supplementary Table 1.

118 Indirect measurements of mitochondrial content<sup>19</sup>, such as mitochondrial protein yield (Fig.

119 1c), citrate synthase (CS) activity (Fig. 1d), and the protein content of OXPHOS subunits

120 assessed in whole-muscle lysates by SDS-PAGE (Fig. 1e, upper panels), increased with

121 training volume and reached significance post-HVT. These observations are consistent with

122 reports of training-induced increases in mitochondrial protein<sup>6,20-22</sup>, CS activity<sup>9</sup>, and

123 OXPHOS subunit levels<sup>18,23</sup> in skeletal muscle, and with the notion that training volume is an

124 important determinant of changes in mitochondrial content<sup>9,16-18</sup>. By design, RVT resulted in

125 no change in any of these markers.

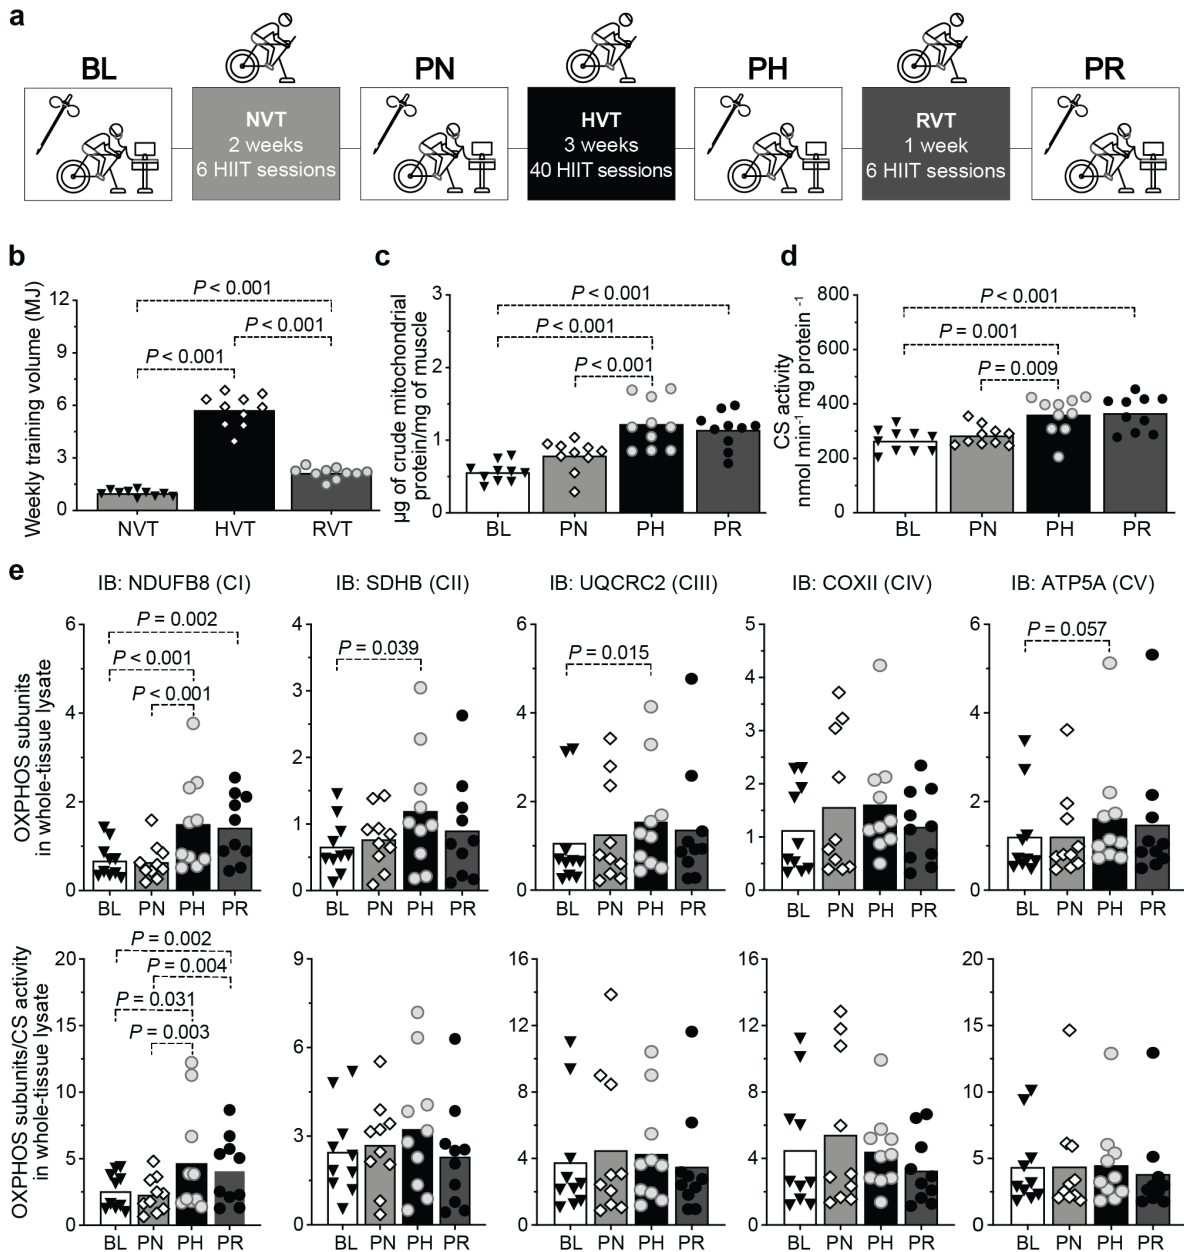

126

127 **Fig 1. Exercise training increases markers of mitochondrial content in human vastus**  
 128 **lateralis muscle in a training-volume-dependent manner.** **a**, Study design. Open boxes  
 129 indicate a resting skeletal muscle biopsy and testing sessions; coloured boxes indicate a  
 130 training phase: NVT (normal-volume training), HVT (high-volume training), and RVT  
 131 (reduced-volume training). **b**, Weekly training volume during the NVT, HVT, and RVT  
 132 training phase; training volume was calculated by multiplying the absolute exercise intensity  
 133 in Watts by the effective duration of exercise training in minutes (excluding the pre-training  
 134 warm up and the rest period between intervals) by the total number of training sessions in  
 135 each phase. **c**, Mitochondrial yield per mg of tissue achieved during mitochondria isolation of  
 136 human vastus lateralis biopsy samples at different time points (biochemical mitochondrial  
 137 protein enrichment). **d**, Citrate synthase (CS) enzyme activity assessed in whole-tissue  
 138 (vastus lateralis) homogenates at each time point. **e**, Top panels: protein content of selected  
 139 subunits of oxidative phosphorylation (OXPHOS) complexes by immunoblotting in whole-  
 140 tissue (vastus lateralis) homogenates at each time point; lower panels: values from top panels



141 normalised by CS activity values obtained in **d**. HIIT: high-intensity interval training; MJ:  
142 megajoules; BL: baseline; PN: post-NVT; PH: post-HVT; PR: post-RVT; CI-V: complex I to  
143 V; IB: immunoblotting; ▼, ◇, ○, and ● represent individual values; bars represent mean  
144 values; n = 10 for all analyses; all datasets analysed by repeated measures one-way ANOVA  
145 followed by Tukey's post hoc testing. Significance:  $P < 0.05$ .

146 The activity of CS, an enzyme located in the mitochondria<sup>24</sup>, strongly correlates with  
147 mitochondrial content (as measured by transmission electron microscopy) in human skeletal  
148 muscle<sup>19</sup>; therefore, to investigate the underpinnings of the training-induced changes in the  
149 OXPHOS subunits, we normalised these values by CS activity - a widely used normalisation  
150 strategy<sup>9,18,19,25</sup>. Following normalisation, the above changes were no longer significant,  
151 except for CI (subunit NDUFB8), indicating that, for the most part, absolute changes in  
152 OXPHOS subunits were stoichiometrically associated with the overall increase in  
153 mitochondrial content (Fig. 1e, lower panels).

154 In addition to increased mitochondrial content, a previous study reported that training  
155 increases the formation of respiratory chain supercomplexes (SCs)<sup>13</sup> - high molecular weight  
156 assemblies comprised of CI, CIII, and CIV<sup>26</sup> - which was suggested to contribute to  
157 improvements in mitochondrial respiration<sup>13</sup>. Although SCs were originally proposed to  
158 support enhanced ETC function<sup>27</sup>, their role is controversial with multiple groups reporting  
159 that they confer no bioenergetic advantage<sup>28</sup>. We performed BN-PAGE analysis of SCs (Fig.  
160 2a) to determine whether training leads to altered abundance and organisation of SCs. While  
161 we observed increases in SC abundance with increasing training volumes, achieving  
162 significance post-HVT (Fig. 2b, upper panels), this increase was no longer significant upon  
163 normalisation by CS activity (Fig. 2b, lower panels), suggesting a stoichiometric relationship  
164 between training-induced increases in mitochondrial content and SC abundance.

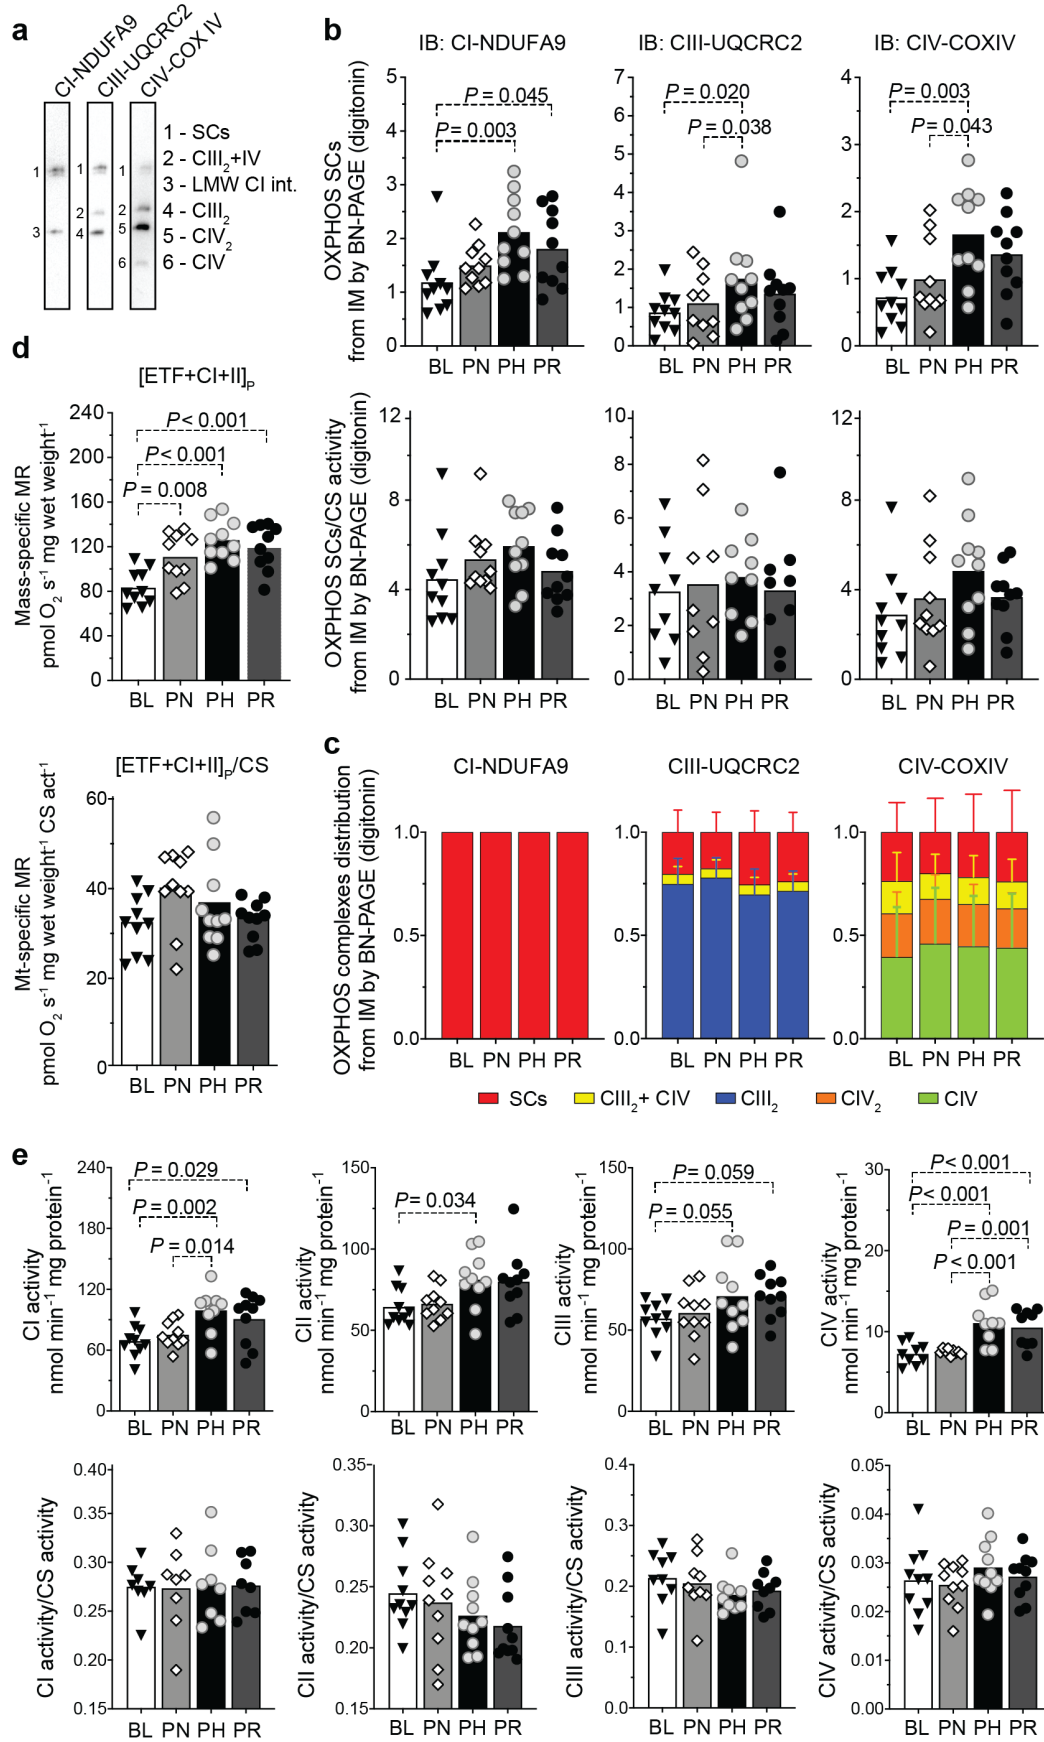

166 **Fig 2. Training-induced increases in mitochondrial respiratory function and**  
167 **supercomplexes in human vastus lateralis muscle are driven by the increase in**  
168 **mitochondrial content.** **a**, Representative BN-PAGE blots of isolated mitochondria (IM)  
169 fractions from human vastus lateralis muscles (images from baseline [BL] IM fractions).  
170 Band 1 (SCs): mature supercomplexes (SCs) consisting of complex I+III<sub>n</sub>+IV<sub>n</sub>; band 2  
171 (CIII<sub>2</sub>+IV): a supercomplex consisting of CIII and CIV; band 3 (LMW CI int): low molecular  
172 weight intermediate of CI (band not present in all samples); band 4 (CIII<sub>2</sub>): CIII dimer; band  
173 5 (CIV<sub>2</sub>): CIV dimer; band 6 (CIV): CIV monomer. **b**, Top panels: protein content of SCs of  
174 the electron transport chain (ETC) by BN-PAGE in IM fractions from human vastus lateralis  
175 muscle biopsies at each time point (same antibodies as in **a**; antibodies probed on separate  
176 membranes); lower panels: values from top panels normalised by citrate synthase (CS)  
177 activity. **c**, Distribution of ETC complexes into SCs from images obtained in **b** at each time  
178 point. **d**, Top panel: maximal mass-specific mitochondrial respiration (MR) in permeabilized  
179 human vastus lateralis muscle fibres with convergent electron input through ETF+CI+CII  
180 ([ETF+CI+II]<sub>P</sub>) at each time point; lower panel: values of mitochondrial- (mt-) specific MR,  
181 obtained after normalising values from the top panel by CS activity ([ETF+CI+II]<sub>P</sub>/CS).  
182 Results for the entire substrate-uncoupler-inhibitor-titration (SUIT) protocol are shown in  
183 Supplementary Fig. 1. **e**, Top panels: enzymatic activity of ETC complexes in whole-tissue  
184 (vastus lateralis) homogenates at each time point; lower panels: values from top panels  
185 normalised by CS activity. PN: post-NVT; PH: post-HVT; PR: post-RVT; IB:  
186 immunoblotting. ▼, ◇, ○, and ● represent individual values; bars represent mean values; error  
187 bars in **c** represent SD; n = 10 for all analyses; datasets analysed by repeated measures one-  
188 way ANOVA followed by Tukey's post hoc testing, except for **c** (right panel) and **d** (lower  
189 panel), which were analysed by Friedman test followed by Dunn's post hoc testing, as not  
190 normally distributed. Significance:  $P < 0.05$ .

191 We next assessed whether exercise training affects the distribution of ETC complexes into  
192 SCs. In contrast to the only previous report showing a post-training redistribution of CIII and  
193 CIV (but not CI) into SCs in elderly individuals<sup>13</sup>, our analysis revealed no significant  
194 changes following any training phase (Fig. 2c). This demonstrates that in young healthy  
195 humans HIIT does not alter the ETC complex distribution within major and minor SC  
196 assemblies. While the contrasting findings may relate to differences in the participants'  
197 average age (66 vs. 22 y) and baseline  $\dot{V}O_{2\max}$  (1.9 vs. 3.6 L min<sup>-1</sup>), as well as the training  
198 interventions (48 sessions of moderate-intensity training in 16 weeks vs. 52 sessions of HIIT  
199 in 9 weeks), our results are consistent with the concept that SC assemblies are a structural  
200 feature of the ETC rather than a phenomenon conferring enhanced bioenergetics<sup>28</sup>. In line  
201 with this, our data indicated that the greatest changes in mitochondrial respiration (Fig. 2d  
202 and Supplementary Fig. 1, both upper panels) occurred in parallel with the greatest changes

203 in SC abundance (Fig. 2b, upper panels). However, following normalisation by CS activity,  
204 both of these adaptations were no longer significant except for a post-NVT increase in fatty  
205 acid-linked mitochondrial (mt-) specific respiration ( $[ETF]_p/CS$  activity) (Fig. 2b, Fig. 2d,  
206 and Supplementary Fig. 1, all lower panels). Therefore, our findings do not support the  
207 hypothesis that training-induced changes in the abundance or organisation of SCs contribute  
208 to improvements in mitochondrial respiration. Instead, our data indicate that changes in  
209 mitochondrial respiration following HIIT could be largely attributed to increases in  
210 mitochondrial content. This is also supported by the observation that the greatest changes in  
211 ETC enzyme activity (Fig. 2e, upper panels) occurred in parallel with the greatest changes in  
212 markers of mitochondrial content (Fig. 1c and d), and that all of these changes were no longer  
213 significant after normalisation by CS activity (Fig. 2e, lower panels). By design, RVT  
214 resulted once again in no change in any of the above measurements.

215 ***Disentangling changes in the mitochondrial proteome from the general increase in***  
216 ***mitochondrial content observed post-training.*** The above findings provide evidence that  
217 altering training volume results in a stoichiometric relationship between training-induced  
218 changes in mitochondrial content and OXPHOS subunits, SC abundance, mitochondrial  
219 respiration, and OXPHOS enzyme activity. Despite this, it remains unknown whether there is  
220 also a fixed stoichiometry between changes in mitochondrial content and individual  
221 mitochondrial proteins. To test this, we first employed RNA sequencing (RNA-seq) based  
222 transcriptomics (Supplementary Table 2). We observed the expected increase in gene  
223 transcripts encoding subunits of the OXPHOS complexes (Fig. 3a, upper panels, compare  
224 with Fig. 1e, upper panels) and enzymes of the tricarboxylic acid (TCA) cycle (Fig. 3a,  
225 central lower panel), consistent with previous studies in humans<sup>29</sup>; however, transcripts for  
226 genes encoding other mitochondrial proteins did not all follow the same trend (Fig. 3a, lower  
227 panels). Gene ontology enrichment analysis of all differentially expressed transcripts (Fig.

228 3b) did not identify significant alterations of pathways involved in mitochondrial respiratory  
 229 function (Fig. 3c; Supplementary Table 3). This reveals a greater complexity in the  
 230 transcriptional responses to exercise than expected; i.e., not all mitochondria-related gene  
 231 transcripts changed in the same direction and with a similar magnitude following different  
 232 training phases (Fig. 3b).

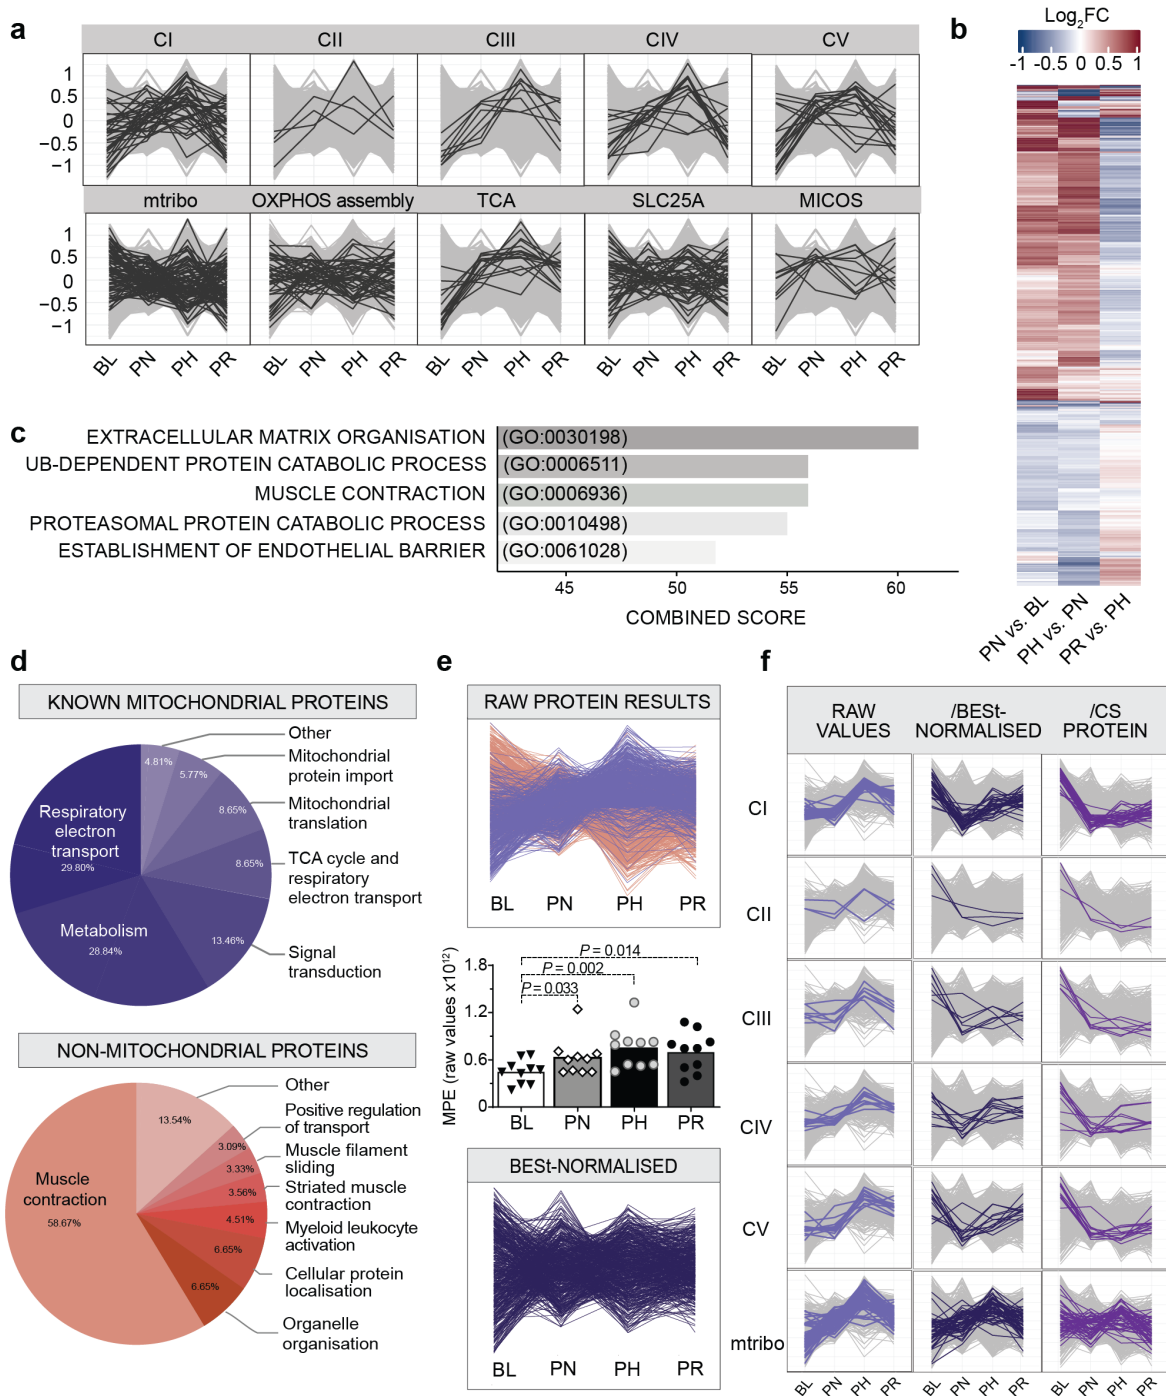

233

234 **Fig 3. RNA-seq and raw proteomic analyses highlights training-induced changes in**  
235 **mitochondrial transcripts and proteins with different training volumes. a,** Profile plots  
236 showing relative scaled transcripts of subunits of the five oxidative phosphorylation  
237 (OXPHOS) complexes (CI to CV), mitochondrial ribosomes (mtribo), OXPHOS assembly,  
238 TCA cycle, SLC25As and mitochondrial contact site and cristae organising system (MICOS)  
239 complex. Transcripts were grouped according to known literature (see methods). **b,** Heatmap  
240 of differentially expressed transcripts between training phases determined with an adjusted  $P$   
241  $< 0.05$  (Benjamini Hochberg). Row clustering determined by unsupervised hierarchical  
242 cluster analysis. **c,** Biological process (BP) gene ontology of all differentially expressed  
243 transcripts as in **b**; the five terms with the highest combined score, as determined by *Enrichr*  
244 (see methods), are displayed. **d,** Pie charts showing the relative enrichment terms, as  
245 determined by *Reactome*, of “known mitochondrial” and “non-mitochondrial” proteins,  
246 identified by the Integrated Mitochondrial Protein Index (IMPI) database (“Known  
247 Mitochondrial”) from isolated mitochondria (IM) fractions. **e,** Training-induced differences  
248 in the mitochondrial protein content of IM fractions. Upper panel: profile plot of all non-  
249 normalised (raw) intensity values displaying “known mitochondrial” (IMPI “Known  
250 Mitochondrial”) (magenta) and non-mitochondrial (salmon) proteins co-precipitating during  
251 mitochondrial isolation. Proteins identified in less than 70% of samples were removed.  
252 Middle panel: mitochondrial protein enrichment (MPE) obtained by adding the raw intensity  
253 values from LC-MS/MS analysis of all “known mitochondrial” proteins (IMPI “Known  
254 Mitochondrial”) at the four different time points. ▼, ◇, ○, and ● represent individual values;  
255 bars represent mean values; analysed by repeated measures one-way ANOVA followed by  
256 Tukey’s post hoc testing. Significance:  $P < 0.05$ . Lower panel: same as upper panel but  
257 following removal of non-mitochondrial proteins and statistical correction (BEST-  
258 normalisation). **f,** Scaled profile plots showing the relative abundance of subunits of OXPHOS  
259 complexes and mtribo of the raw intensity values of “known mitochondrial” proteins (IMPI  
260 “Known Mitochondrial”) following valid value filtering (left panels), and values obtained  
261 after BEST-normalisation (central panels), or after normalisation by the protein content of  
262 citrate synthase (CS) from the proteomics analysis (right panels). BL: baseline; PN: post-  
263 NVT; PH: post-HVT; PR: post-RVT.  $n = 5$  for **a**, **b**, and **c**,  $n = 10$  for all other analyses.

264 As transcriptomics suggested there may not be a fixed stoichiometry between training-  
265 induced changes in mitochondrial content and individual mitochondrial proteins, we sought  
266 to confirm this by quantitative proteomics. To negate the general increase in mitochondrial  
267 content following exercise training and avoid this inherent bias on our proteomics  
268 measurements, we performed label-free quantitative (LFQ) proteomics on equal amounts of  
269 protein isolated from biopsies using differential centrifugation (biochemical enrichment). We  
270 quantified 1,411 proteins - 726 of which were annotated as mitochondrial based on either the  
271 Mitocarta2.0<sup>30</sup> or Integrated Mitochondrial Protein Index (IMPI; Known and Predicted  
272 Mitochondrial)<sup>8</sup> databases (Supplementary Table 4). Considering only the high-confidence

273 IMPI (Known Mitochondrial) dataset<sup>8</sup> (584 annotated mitochondrial proteins), mitochondrial  
274 proteins represented 41% of the total number of proteins identified in our mitochondrial  
275 isolates, contributing to 32% of the overall protein abundance based on raw intensity data for  
276 each protein (Supplementary Table 4). This indicated the presence of a significant proportion  
277 of non-mitochondrial proteins following mitochondrial isolation.

278 To better characterise our mitochondrial isolates, we performed separate enrichment analyses  
279 on both the high-confidence mitochondrial proteins (IMPI Known Mitochondrial<sup>8</sup>) and the  
280 remaining proteins detected across all samples. While known mitochondrial proteins were  
281 enriched in mitochondrial ontologies as expected, other proteins co-isolating with  
282 mitochondria were predominantly of myofibrillar origin (Fig. 3d), consistent with most  
283 mitochondria in skeletal muscle being tightly associated with myofibrils<sup>31</sup>. This suggests that  
284 increases in mitochondrial proteins observed with training (Fig. 3e, upper panel, magenta  
285 profiles) may result from differences in mitochondrial protein enrichment (MPE) - the  
286 contribution of mitochondrial protein intensities relative to all protein intensities - in our  
287 mitochondria isolates at different time points (e.g., greatest MPE post-HVT). Indeed, the  
288 MPE for the 4 different time points was significantly different (Fig. 3e, middle panel) and  
289 corresponded to 24.5% at baseline (BL), 31.5% post-NVT (PN), 39.3% post-HVT (PH), and  
290 34.5% post-RVT (PR) (Supplementary Table 4) - a pattern consistent with our assessment of  
291 mitochondrial content (compare Fig. 3e, middle panel with Fig. 1c and d). This confirmed the  
292 training-induced increase in mitochondrial proteins and demonstrated that the MPE in our  
293 biochemically enriched mitochondrial isolates changed with training. To eliminate the bias  
294 arising from different MPEs across time points, we complemented our biochemical  
295 enrichment approach with a statistical correction strategy consisting of *i*) removing proteins  
296 that were identified in less than 70% of samples, *ii*) sub-setting the known mitochondrial  
297 proteins from the non-mitochondrial proteins, and *iii*) undertaking variance stabilising

298 normalisation (VSN) to reduce variation between human participants (see methods for more  
299 detail). This resulted in the retention of 498 mitochondrial proteins quantified across the  
300 dataset with high confidence (Supplementary Table 5). Importantly, unlike CS activity, which  
301 is a single value for each sample, our normalisation method utilises the trends of hundreds of  
302 proteins and reduces the confounding effect of potential outliers. Plotting the resulting data  
303 revealed that the general increase in mitochondrial proteins with different training volumes  
304 had been compensated for, indicating that our biochemical enrichment and statistical  
305 correction (BEST-normalisation) was successful (Fig. 3e, lower panel). In further support of  
306 our normalisation strategy, principal component analysis showed good segregation of  
307 samples corresponding to the different time points (Supplementary Fig. 2a, left panel).

308 Proteomics analysis of non-normalised intensity values revealed an increase in the relative  
309 abundance of OXPHOS subunits in the mitochondrial isolates after the first two training  
310 phases, and a decrease post-RVT (Fig. 3f, left panels). Moreover, this provides evidence of a  
311 coordinated training-induced adaptation as almost all of the 78 OXPHOS subunits identified  
312 changed in a concerted fashion during training. An advantage of our BEST-normalisation is  
313 that it enabled an unbiased comparison of the changes in individual mitochondrial proteins  
314 relative to the overall increase in mitochondrial content following different training phases.  
315 Following BEST-normalisation, the content of OXPHOS subunits exhibited discreet and  
316 specific changes in response to different training volumes, including a generalised post-NVT  
317 decrease (Fig. 3f, central panels; results discussed in more detail later). Similar results were  
318 obtained when normalising proteomics data by the protein content of CS derived by  
319 proteomics assessment (Fig. 3f, right panels), and when normalising SDS-PAGE immunoblot  
320 intensities of OXPHOS subunits detected in mitochondrial isolates by CS activity  
321 (Supplementary Fig. 2b). In contrast, even after BEST-normalisation, the levels of  
322 mitochondrial ribosomal subunits increased both post-NVT and post-HVT and decreased



323 post-RVT (Fig. 3f, central panels). Taken together, these results demonstrate the absence of a  
324 fixed stoichiometry between training-induced changes in individual mitochondrial proteins  
325 and overall mitochondrial content.

326 From this point onwards, unless specified otherwise, post BEST-normalisation proteomics  
327 results will be presented, enabling the investigation of training-induced changes in  
328 mitochondrial proteins without the influence of the overall increase in mitochondrial content.

329 ***Discovery of novel mitochondrial proteins and functional classes differentially affected by***  
330 ***exercise training.*** We next interrogated our BEST-normalised mitochondrial proteome to  
331 better understand non-stoichiometric changes in individual mitochondrial proteins to different  
332 training volumes. We performed an ANOVA and identified 185 mitochondrial proteins that  
333 were differentially expressed across the three training phases (Supplementary Table 6). This  
334 is far greater than the number of proteins previously reported to change post-training in  
335 human skeletal muscle<sup>31-34</sup> (Supplementary Fig. 2c). Unsupervised hierarchical clustering of  
336 all differentially expressed mitochondrial proteins revealed six clusters with distinct patterns  
337 of change in response to training (Fig. 4a; Supplementary Fig. 3a). These findings confirm  
338 the absence of a fixed stoichiometry between training-induced changes in individual  
339 mitochondrial proteins.

340 Enrichment analysis of differentially expressed proteins within each cluster revealed these to  
341 be enriched in, but not always exclusively contain, proteins involved in fatty acid  $\beta$ -oxidation  
342 (FAO), mitochondrial translation, the TCA cycle, OXPHOS, metabolism of amino acids, and  
343 cristae formation, respectively (Supplementary Fig. 3b; Supplementary Table 6). Because not  
344 all proteins belonging to each individual Reactome pathway segregated within one cluster  
345 (Supplementary Fig. 3c), we compared our 185 differentially expressed proteins with proteins

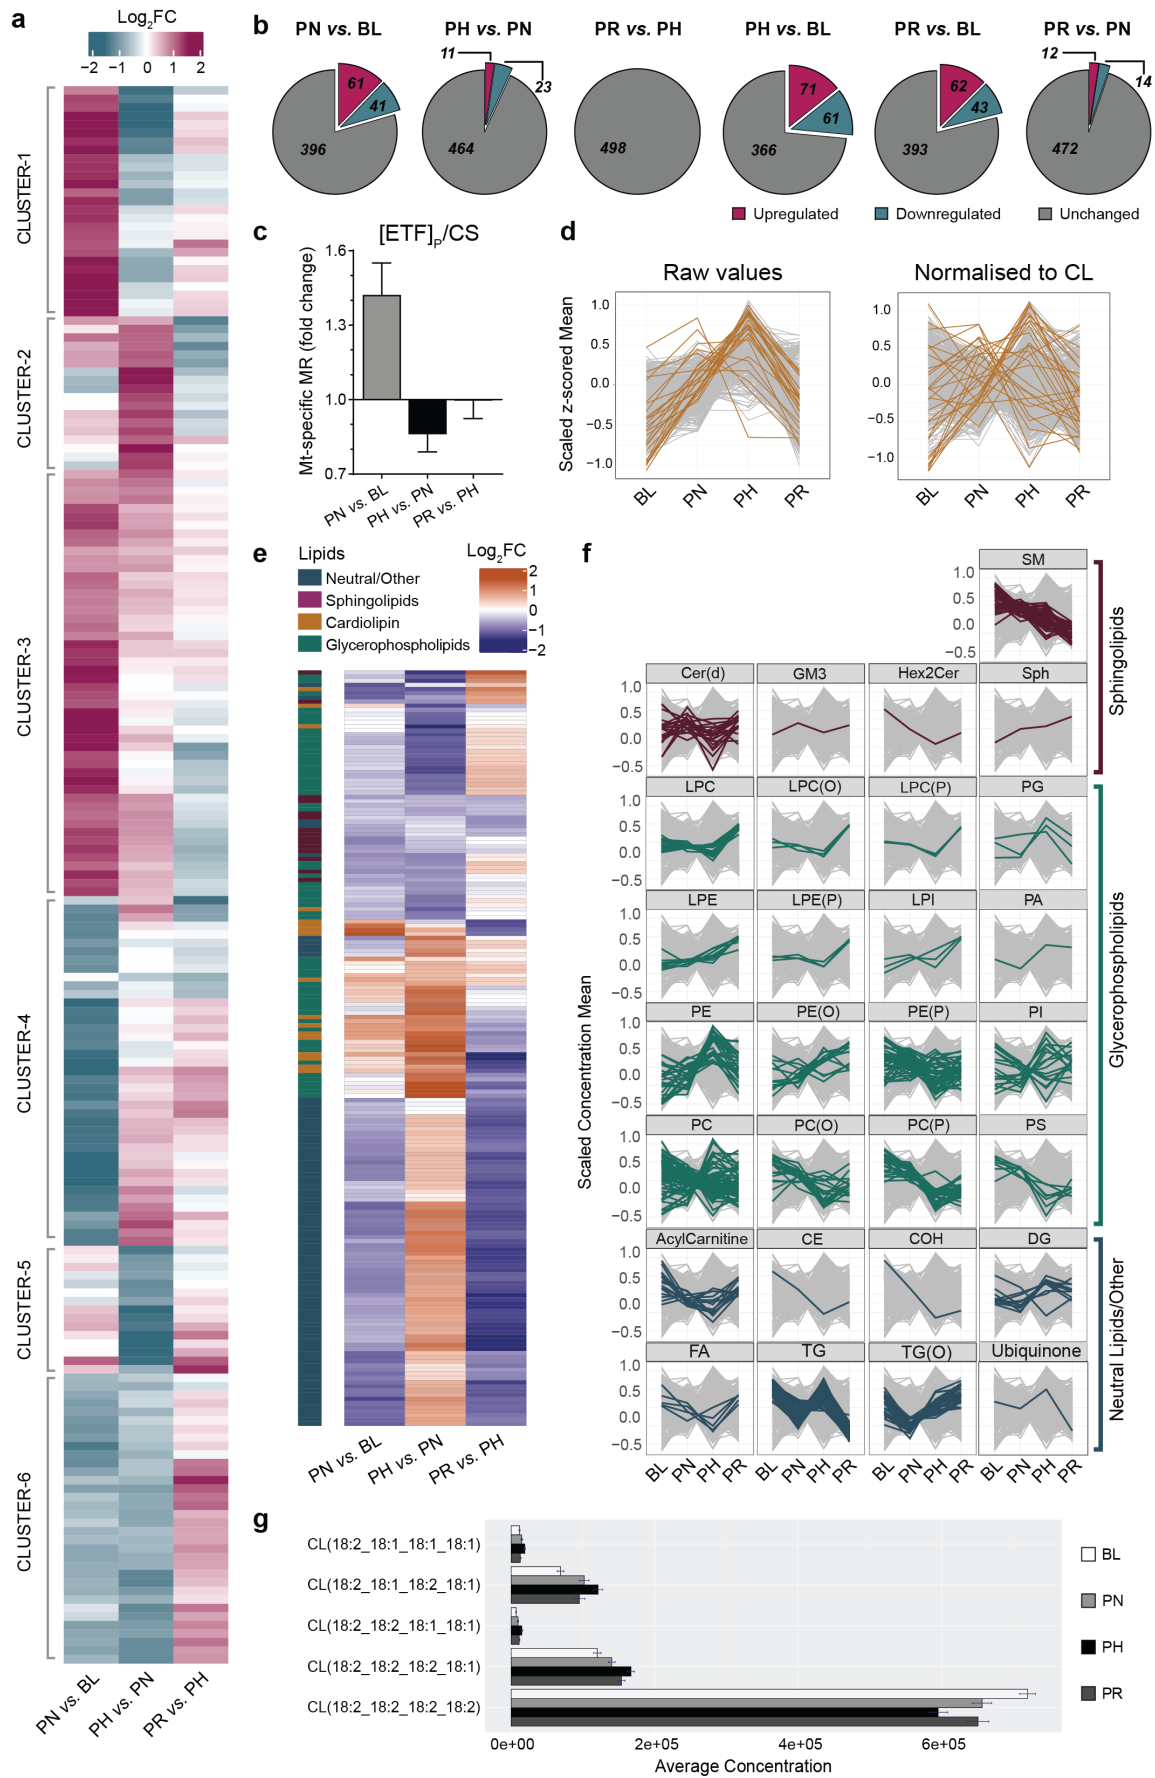

347 **Fig 4. Training-induced differential prioritisation and non-stoichiometric adaptations in**  
348 **the proteome and lipidome.** **a**, Heatmap of BEST-normalised differentially expressed  
349 mitochondrial proteins (IMPI “Known Mitochondrial”) between training phases determined  
350 with an adjusted  $P < 0.01$  (Benjamini Hochberg). Row clustering determined by  
351 unsupervised hierarchical cluster analysis. **b**, Venn diagram representations of the number of  
352 BEST-normalised differentially expressed mitochondrial proteins (IMPI “Known  
353 Mitochondrial”) between each of the time points. Differentially expressed proteins for each  
354 time point comparison were identified by linear modelling with an adjusted  $P$  value  $< 0.01$   
355 using the Benjamini Hochberg method (Supplementary Table 8). **c**, Mitochondrial- (mt-)  
356 specific respiration (obtained by normalising the equivalent value of mass-specific  
357 mitochondrial respiration [MR] by citrate synthase [CS] activity) in permeabilized human  
358 vastus lateralis muscle fibres with electron input through ETF via addition of  
359 octanoylcarnitine and pyruvate; data derived from the substrate-uncoupler-inhibitor titration  
360 (SUIT) protocol shown in Supplementary Fig. 1. **d**, Left panel: all-lipids profile plot of non-  
361 normalised (raw) intensity values from mitochondrial isolates displaying all individual CL  
362 species (gold) and all other lipid species (grey) at each time point. Right panel: same as left  
363 panel after normalisation by the entire CL class. **e**, Heatmap of differentially expressed lipids  
364 after normalisation by the entire CL class between training phases determined with an  
365 adjusted  $P < 0.05$  (Benjamini Hochberg). Row clustering determined by unsupervised  
366 hierarchical cluster analysis. **f**, Profile plots of the scaled concentration mean of different  
367 lipid classes. For each profile plot, all the individual lipid species identified within the  
368 specific class are represented in colour over the entire lipidome (grey) at each time point. The  
369 intensity values for all lipid species were normalised by the entire CL class to adjust for  
370 changes in mitochondrial content. **g**, The 5 most abundant CL species that were differentially  
371 expressed as determined in **e**; the complete list of differentially expressed CL species is  
372 shown in Supplementary Fig. 4b. BL: baseline; PN: post-NVT; PH: post-HVT; PR: post-  
373 RVT.  $n = 10$  for all analyses.

374 belonging to the pathway protein list (Reactome R-HSA) associated with each of the above  
375 six pathways (Supplementary Table 7); matching proteins were used to generate the  
376 individual pathway heatmaps presented in Fig. 5 and have been used to discuss our findings  
377 in the results section. These pathway heatmaps also included other proteins known to be  
378 involved in the specific pathway of interest identified through literature but absent in the  
379 Reactome pathway protein list (see methods for more information); moreover, pathways  
380 other than the aforementioned six were also investigated. Proteins involved in two or more  
381 pathways were either presented in both pathways or were assigned to the pathway involving  
382 the protein’s primary function and/or most closely matching their training-induced changes.  
383 To pinpoint the origin of training-induced changes in individual mitochondrial proteins, we  
384 performed unpaired t-tests between group pairs following permutation-based false discovery

385 rate (FDR) correction. Using a conservative approach, we matched the differentially  
386 expressed proteins identified by each t-test comparison with the 185 differentially expressed  
387 proteins identified by the ANOVA (Supplementary Table 8). The majority of changes  
388 occurred during the initial NVT phase (Fig. 4b; Supplementary Table 8), where 102 proteins  
389 were differentially expressed, suggesting that the greatest number of mitochondrial  
390 adaptations took place within the first few training sessions and they became harder to obtain  
391 as the training progressed (Fig. 4a, note the strongest changes are found in the “PN vs. BL”  
392 column). Our study also confirms that the training stimulus during the RVT phase was  
393 sufficient to prevent loss of adaptations (Fig. 4b; Supplementary Table 8).

394 ***Proteins important for the translation of mitochondrial proteins are sensitive to training***  
395 ***volume.*** We next examined the six over-represented pathways highlighted by our enrichment  
396 analysis, beginning with the pathway related to mitochondrial protein translation (Fig. 5),  
397 which mostly segregated within cluster-2 (Supplementary Fig. 3b and c; Supplementary  
398 Table 6). Specifically, we identified proteins from both the small 28S (MRPS5, MRPS22,  
399 MRPS27) and large 39S (MRPL4, MRPL18) subunits of the mitochondrial ribosome, as well  
400 as proteins involved in translation initiation (MTIF2) and elongation (GFM1, PTC3, TFSM,  
401 TUSM) (Fig. 5). Whereas only four proteins were upregulated post-NVT, eight of the 10  
402 aforementioned proteins were upregulated post-HVT, with six remaining elevated post-RVT  
403 (Supplementary Table 8). To the best of our knowledge, this is the first study to directly  
404 demonstrate training-induced changes in these or related mitochondrial translation proteins in  
405 young, healthy humans, as previous research reported training-induced increases in older (65  
406 to 80 years), but not younger (18 to 30 years), individuals<sup>34</sup>. Our findings also indicate that  
407 changes in proteins involved in mitochondrial protein translation are sensitive to training  
408 volume, consistent with a study observing a positive association between these proteins and  
409 physical activity levels in healthy individuals (20 to 87 years)<sup>35</sup>.

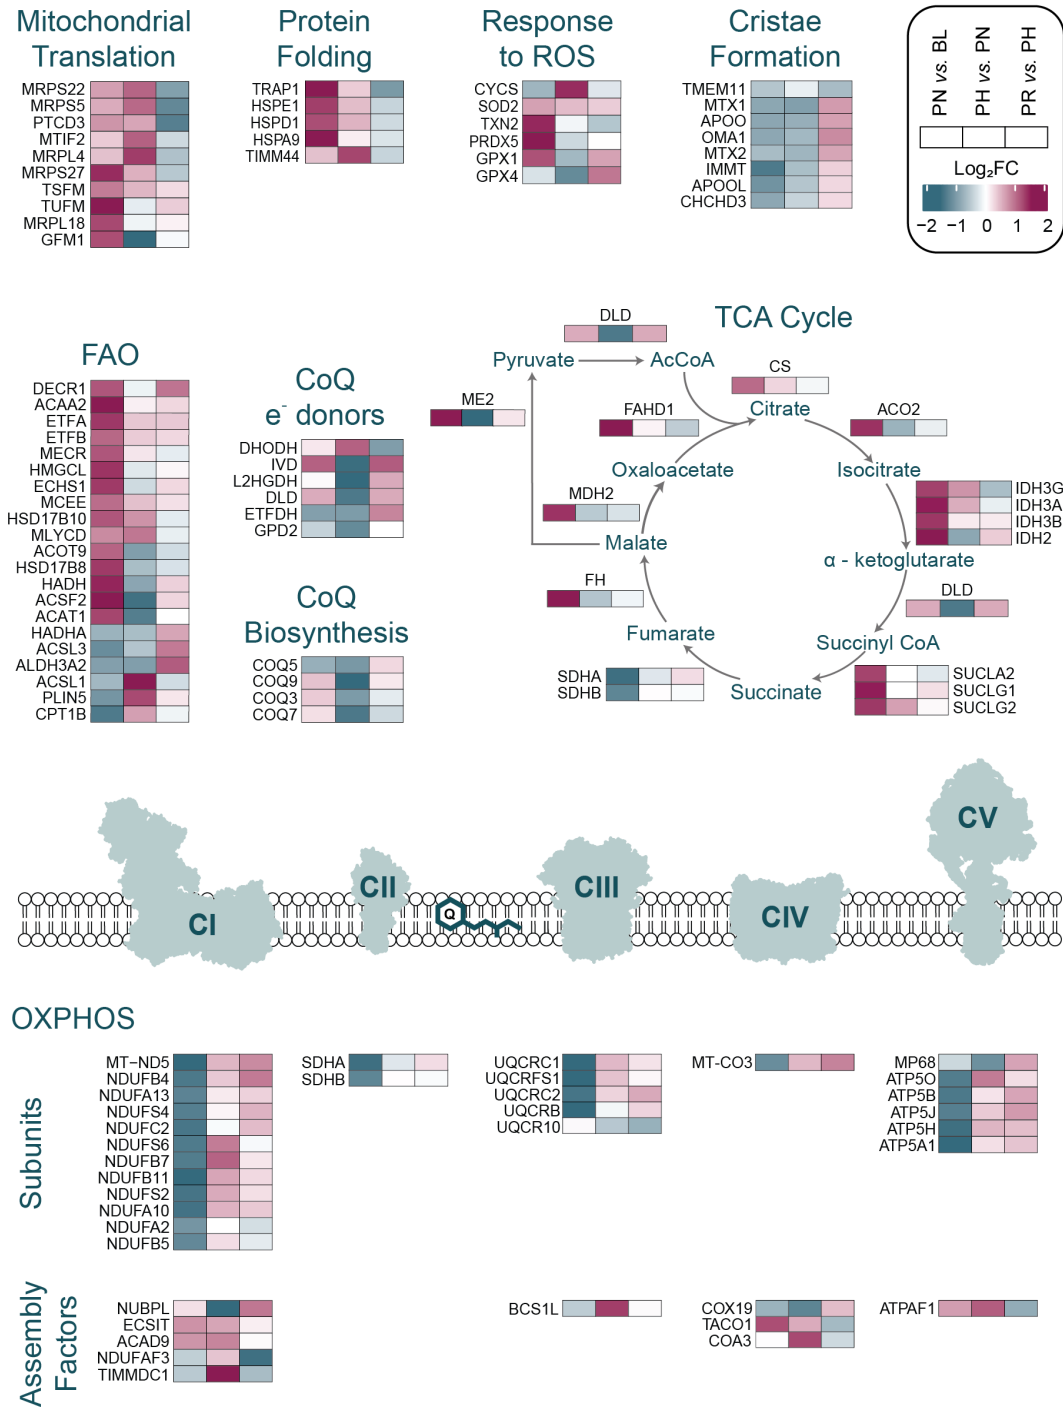

410

411 **Fig 5. Overview of training-induced changes in mitochondrial protein functional classes**  
 412 **and metabolic pathways.** Protein functional classes and/or metabolic pathways (defined in  
 413 Supplementary Table 7) as determined in Supplementary Table 8. Row clustering determined  
 414 by unsupervised hierarchical cluster analysis. BL: baseline; PN: post-NVT; PH: post-HVT;  
 415 PR: post-RVT; ROS: reactive oxygen species; FAO: fatty acid  $\beta$ -oxidation; CoQ: Coenzyme  
 416 Q; TCA: tricarboxylic acid cycle; OXPHOS: oxidative phosphorylation.

417 ***Mitochondria prioritise the TCA cycle and FAO in response to NVT.*** Proteins involved in  
418 the TCA cycle pathway grouped mainly within cluster-3 and, to a lesser extent, cluster-1  
419 (Supplementary Fig. 3b and c; Supplementary Table 6). This pathway was characterised by a  
420 large and concerted increase post-NVT (12 of 16 enzymes were significantly increased), with  
421 many of these proteins remaining upregulated compared to BL both post-HVT and post-RVT  
422 (Fig. 5, Supplementary Table 8). Of note, SDHA and SDHB, subunits of CII - the only TCA  
423 cycle enzyme that also participates in the ETC - clustered with the majority of OXPHOS  
424 subunits (discussed below) and decreased during NVT. While training-induced changes in  
425 some TCA cycle proteins have been reported<sup>31,33</sup>, this is the first study to reveal training-  
426 induced increases in ACO2, SUCLG1, SUCLG2, SUCLA2, and FAHD1, and that these  
427 enzymes adapted mostly in a coordinated fashion.

428 Proteins involved in FAO segregated mainly within cluster-1 and cluster-3 (Supplementary  
429 Fig. 3b and c; Supplementary Table 6). Our data demonstrated a large and concerted increase  
430 in these proteins post-NVT, with minimal (HVT) and no (RVT) changes thereafter (Fig. 5;  
431 Supplementary Table 8). Proteins increased post-NVT included chain shortening enzymes  
432 involved in FAO (ACAA2, ACSF2, ECHS1, HADH, HSD17B10, MECR, MLYCD) and  
433 enzymes required to convert unsaturated fatty acids into intermediates of FAO (DECR1 and  
434 HSD17B8). Similar increases were also observed for ETFA and ETFB, which transfer  
435 electrons produced during FAO to the OXPHOS system. These findings demonstrate an early  
436 increase in FAO, as confirmed by the post-NVT increase in FAO-linked mt-specific  
437 respiration ([ETF]<sub>p</sub>/CS, Fig. 4c). These results are also consistent with previous reports  
438 observing training-induced increases in FAO-linked mitochondrial respiration after as few as  
439 six training sessions<sup>9,36,37</sup>. HMGCL and ACAT1, two enzymes involved in the ketogenesis  
440 pathway, were also increased, possibly suggesting that excess acetyl-CoA generated by  
441 accumulative FAO may be fed into ketogenesis. Taken together, these findings indicate that

442 the synthesis of proteins involved in both the TCA cycle and FAO pathways is prioritised in  
443 the early stages of an HIIT intervention; these increases may have contributed, at least in part,  
444 to the training-induced increase in mitochondrial respiration (Supplementary Fig. 1, upper  
445 panels).

446 ***Lipidomics highlights a divergent response to training of different lipid classes.*** To  
447 highlight specific changes in fatty acid composition, LC-MS/MS based comparative  
448 lipidomics was performed using the same mitochondrial isolates used for proteomics. A total  
449 of 779 species representing 30 lipid classes (Supplementary Table 9) were quantified.  
450 Changes in cardiolipins (CLs), an essential component for optimal mitochondrial structure  
451 and bioenergetics<sup>38</sup>, mirrored changes in training volume and in non-normalised  
452 mitochondrial proteins (compare Fig. 4d, left panel with Fig. 3e, upper panel; Supplementary  
453 Table 9). Indeed, CL is the biomarker most strongly associated with mitochondrial content in  
454 human skeletal muscle<sup>19</sup>; therefore, to ensure that our lipidomics data were corrected for  
455 changes in MPE in our fractions, we applied a similar approach to the one used for  
456 proteomics where lipidomic results were normalised according to the trend observed for the  
457 CL class (see methods). Post-normalisation profile plots of CL species indicated that, despite  
458 changes in individual CL species, the general increase in mitochondrial content with different  
459 training volumes had been compensated for by our normalisation strategy (Fig. 4d; right  
460 panel), and the lipid profiles could be used to readily segregate samples according to training  
461 volume (Supplementary Fig. 2a, right panel). From this point on we will present lipidomics  
462 results obtained post normalisation, unless specified otherwise.

463 We identified a total of 182 differentially expressed lipid species (Fig. 4e; Supplementary  
464 Table 10). Similar to proteomics, and consistent with previous research in humans<sup>39,40</sup>, our  
465 study highlighted the divergent response to training of different lipid classes and species

466 relative to overall changes in mitochondrial content (compare Fig. 4f with Supplementary  
467 Fig. 3a). However, in contrast to proteomics, where the greatest number of changes was  
468 observed early (during NVT) and no changes were observed during RVT, our lipidomics  
469 assessment showed no significant changes during NVT, but changes during RVT, with the  
470 greatest number observed during HVT (Supplementary Fig. 4a), possibly suggesting a  
471 delayed response in lipids compared to proteins. In general, training-induced changes in lipid  
472 species were mainly related to mitochondrial membrane-based lipids (CLs,  
473 phosphatidylethanolamines and phosphatidylcholines) and the triglycerides (TGs)  
474 (Supplementary Fig. 4a). Contrary to previous training studies in obese humans<sup>39-41</sup>, we did  
475 not observe reductions in muscle ceramides [with the exception of Cer(d18:1/18:0) during  
476 HVT] or diacylglycerol content in our healthy, young men following training. While this  
477 could indicate a different response of lipid species in mitochondria isolates (our study)  
478 compared to whole-muscle lysates<sup>39-41</sup>, as previously suggested<sup>42</sup>, it could also highlight  
479 adaptation differences between obese and healthy individuals.

480 Of relevance to the increase in FAO reported above, we observed a post-NVT decrease in  
481 TGs (Fig. 4f), a class of lipids used as an important source of energy production during  
482 exercise<sup>43</sup>; however, likely due to the high number of multiple comparisons in our  
483 bioinformatic analysis (n = 779), no significant changes in single TG species were detected  
484 (Supplementary Fig. 4a). The decrease in TGs in our study is likely indicative of an increase  
485 in fatty acid turnover, which would be consistent with the reported post-NVT increase in both  
486 FAO enzymes (Fig. 5) and FAO-linked mt-specific respiration (Fig. 4c). Finally, changes in  
487 TGs (Fig. 4f), which are not found in mitochondria but rather in lipid droplets<sup>44</sup>, mirrored  
488 changes in PLIN5 (Fig. 5). Since PLIN5 is a protein that tethers mitochondria to lipid  
489 droplets and regulates the release of lipids for FAO<sup>45,46</sup>, we hypothesise that training-induced  
490 changes in TGs may indicate changes in association of lipid droplets with mitochondria.



491 While few studies have evaluated the effects of different training interventions on skeletal  
492 muscle lipid species, our results add to the growing evidence that changes with training are  
493 specific to the exercise prescription and that training volume is also an important determinant  
494 of changes in lipid species.

495 ***Synthesis of OXPHOS subunits is not a priority in the early adaptations to HIIT.*** We next  
496 examined the OXPHOS pathway, which segregated almost entirely in cluster-4  
497 (Supplementary Fig. 3b and c; Supplementary Table 6). We report training-induced changes  
498 in 26 OXPHOS subunits (Fig. 5), equivalent to ~33% of all subunits identified, most for the  
499 first time. Differentially expressed OXPHOS proteins included subunits from all six of the  
500 modules required for the assembly of CI, both catalytic subunits of CII, as well as subunits  
501 from CIII, one of the three core subunits of CIV, and proteins found in both functional  
502 domains of CV. Specifically, we observed a large and coordinated (23 subunits) decrease  
503 post-NVT, with no changes during HVT and/or RVT (Fig. 5; Supplementary Table 8).  
504 Changes in SLC25A4 (ANT1), a protein catalysing the exchange of cytosolic ADP and  
505 mitochondrial ATP across the mitochondrial inner membrane<sup>47</sup>, mirrored these changes  
506 (Supplementary Table 8). The post-NVT decrease in OXPHOS subunits indicates that during  
507 times of increased biogenesis the synthesis of proteins involved in pathways other than  
508 OXPHOS is prioritised. The number of OXPHOS subunits that were significantly decreased  
509 compared to BL was reduced as the training progressed (23, 14, and 8 for post-NVT, post-  
510 HVT, and post-RVT, respectively). Indeed, our results demonstrated a large post-NVT  
511 increase in TCA cycle and FAO related enzymes, the major providers of reducing equivalents  
512 (NADH and FADH<sub>2</sub>) to the OXPHOS system<sup>48</sup>; this suggests that enhancement of these two  
513 metabolic pathways may be more important to increase mitochondrial respiration following  
514 exercise training (Supplementary Fig. 1, upper panels) than an increase in OXPHOS subunits.  
515 However, an increase in reducing equivalents coupled with the de-prioritisation of the

516 OXPHOS machinery could lead to increased reactive oxygen species (ROS) generation. Here  
517 we report an immediate post-NVT increase in the abundance of enzymes involved in  
518 protection from oxidative stress, such as PRDX5 (the most increased protein), TXN2, and  
519 GPX1<sup>49</sup> (Fig. 5; Supplementary Table 8). Moreover, both SOD2, the mitochondrial ROS  
520 scavenger<sup>49</sup>, and PRDX5 were increased post-HVT and post-RVT. This suggests that  
521 training-induced synthesis of proteins involved in the protection from oxidative stress was  
522 emphasised early during the training intervention and maintained throughout, consistent with  
523 the notion that exercise training provides protection against oxidative stress<sup>49,50</sup>.

524 The coordinated assembly of OXPHOS complexes involves various assembly factors,  
525 chaperones, and protein translocation components, and has been suggested to be in the order  
526 of days<sup>51</sup>. Whereas increases in OXPHOS assembly factors occurred mostly post-HVT (Fig.  
527 5; Supplementary Table 8), changes in subunits of the mitochondrial ribosome (Fig. 3f, lower  
528 central panel), which synthesise the 13 OXPHOS subunits encoded by mitochondrial DNA,  
529 and in several chaperone proteins regulating import and folding of proteins destined for the  
530 mitochondrial matrix, took place earlier (post-NVT; Fig. 5; Supplementary Table 8).

531 Chaperone proteins upregulated post-NVT included HSPA9 (mtHSP70), HSPD1 (mtHSP60),  
532 HSPE1 (mtHSP10), and TRAP1 (mtHSP90), whereby TIMM44 was increased during HVT  
533 (Fig. 5; Supplementary Table 8). All five proteins remained elevated compared to BL both  
534 post-HVT and post-RVT. Except for HSPE1<sup>31</sup>, none of the above chaperones has previously  
535 been reported to respond to exercise. All of these chaperones are known to interact<sup>52</sup>, which  
536 suggests a coordinated increase in the protein quality control system in response to exercise  
537 training. While we detected many subunits of the translocases of the outer and inner  
538 membrane (TOM and TIM, respectively; Supplementary Table 4), which are required for  
539 importing nuclear-encoded subunits<sup>53</sup>, most did not significantly change with training,

540 suggesting that their levels remain stable and are sufficient to support training-induced  
541 increases in mitochondrial biogenesis.

542 Given the importance of CLs for the assembly and stability of mitochondrial membrane  
543 protein complexes and respiratory chain SCs<sup>54,55</sup> we again interrogated our normalised  
544 mitochondrial lipidome. We observed a remodelling of CL composition (Fig. 4g;  
545 Supplementary Fig. 4b). Notably, following NVT and HVT, we observed a decrease in the  
546 abundance of tetra-linoleoyl CL (18:2\_18:2\_18:2\_18:2), the dominant form of CLs found in  
547 skeletal muscle<sup>56</sup>. Accompanying this were concomitant increases in CLs containing oleic  
548 acid (18:1) and to a lesser extent palmitoleic acid (16:1) acyl chains (Fig. 4g; Supplementary  
549 Fig. 4b). This may reflect a lack in relative availability of dietary linoleic acid due to  
550 increased mitochondrial biogenesis, since the nature of CL remodelling catalysed by TAZ,  
551 which was unaltered in our dataset, appears to be controlled predominantly by lipid  
552 availability<sup>57</sup>. This compensation in CL content is in line with our observation that increased  
553 training volume does not lead to changes in respiratory chain SC assembly (Fig. 2c) or the  
554 content-normalised OXPHOS enzyme activities we observed post-NVT and post-RVT (Fig.  
555 2e, lower panels).

556 ***Coenzyme Q biosynthesis and cristae formation are not prioritised during high-volume***  
557 ***HITT.*** Despite enrichment analysis suggesting cluster-5 to be enriched in metabolism of  
558 amino acids and derivatives, upon further inspection we identified this cluster to  
559 predominantly contain proteins involved in the biosynthesis and function of coenzyme Q  
560 (CoQ or ubiquinone; Supplementary Fig. 3b and c; Supplementary Table 6) - an enzyme with  
561 an essential role as an electron transfer lipid in OXPHOS processes<sup>58</sup>. We identified changes  
562 in four constituents (COQ3, COQ5, COQ7, COQ9) of the CoQ synthome (Fig. 5;  
563 Supplementary Table 7), a multi-subunit complex necessary for the biosynthesis of CoQ<sup>59</sup>.

564 We report no changes post-NVT, consistent with previous research investigating the effects  
565 of short-duration (< 3 weeks) exercise training on CoQ content in human skeletal muscle<sup>60</sup>.  
566 However, post-HVT we report a concerted reduction in three of these proteins, which also  
567 persisted post-RVT (Supplementary Table 8). This indicates that CoQ biosynthesis is not  
568 prioritised in response to high-volume HIIT, suggesting that enhancing the CoQ pool may not  
569 be a priority to support the increase in mitochondrial respiration in human skeletal muscle.

570 CoQ is an electron carrier shuttling electrons derived from the TCA cycle (via CI and CII),  
571 pyrimidine biosynthesis (via DHODH), glycolysis (via GPD2), and FAO (via EFTDH) to  
572 Complex III<sup>48</sup>. Moreover, other enzymes located near or on the inner mitochondrial  
573 membrane feeding electrons to CoQ, such as IVD<sup>61</sup>, DLD<sup>62</sup>, and L2HGDH<sup>63</sup>, were also  
574 identified in our study (Supplementary Table 7). Similar to the decrease reported above in CI  
575 and CII subunits post-NVT, we report decreases in four of these enzymes during HVT, with  
576 three of them remaining downregulated both post-HVT and post-RVT; conversely, IVD was  
577 increased during NVT and DHODH was elevated post-HVT (Fig. 5; Supplementary Table 8).  
578 The lack of a clear correlation between the content of the above proteins and that of CoQ may  
579 be ascribed to changing preferences for energy utilisation over the course of the training  
580 intervention, as also indicated by the differential prioritisation of the various metabolic  
581 pathways described above.

582 The mitochondrial contact site and cristae organising system (MICOS) is pivotal for the  
583 formation of cristae junctions, providing the extended membrane surface hosting OXPHOS  
584 complexes<sup>64</sup>. The MICOS associates with the outer membrane sorting and assembly  
585 machinery (SAM) to yield the mitochondrial intermembrane space bridging complex (MIB),  
586 thus linking the mitochondrial inner and outer membranes<sup>64</sup>. Eight proteins involved in  
587 cristae formation were differentially expressed in our study: APOO (MIC26), APOOL

588 (MIC27), CHCHD3 (MIC19), and MIC60 from the MICOS complex; MTX1 and MTX2  
589 from the SAM complex; TMEM11, a protein associating with multiple MICOS subunits for  
590 cristae biogenesis<sup>65</sup>; and OMA1, a mitochondrial protease regulating OPA1<sup>66</sup> - a key protein  
591 implicated in cristae remodelling<sup>67</sup> (Fig. 5; Supplementary Table 7). Seven of these proteins,  
592 which almost entirely grouped within cluster-6 (Supplementary Fig. 3b and c; Supplementary  
593 Table 6), were significantly decreased post-HVT, with four being decreased post-RVT  
594 (Supplementary Table 8). To our knowledge, this is the first study to report a training-  
595 induced de-prioritisation of these proteins. This is consistent with the minimal changes  
596 observed in cristae density following short-term (< 3 months) exercise training in obese  
597 individuals<sup>68</sup>. Thus, our results support the notion that cristae remodelling is not a priority  
598 during short-term training and that changes in other mitochondrial proteins are more  
599 important to adapt to the higher metabolic demand of exercise. Despite MICOS-MIB  
600 subunits being known to interact with CLs<sup>69</sup>, we report no correlation between the levels of  
601 MICOS-MIB subunits and changes in CLs content following different training volumes.

## 602 **Conclusions**

603 Although endurance training has long been known to promote mitochondrial adaptations in  
604 skeletal muscle<sup>6,7</sup>, and much progress has been made in the understanding of training-induced  
605 mitochondrial biogenesis<sup>9,16</sup>, many of the underlying adaptive processes remain unknown or  
606 poorly understood. The present study addressed this fundamental gap by combining classic  
607 biological analyses with a multi-omics approach, enabling the elucidation of many novel  
608 adaptations to exercise training in humans. Our study demonstrated a training volume-  
609 dependent increase in mitochondrial respiration and enzyme activity, as well as OXPHOS  
610 protein content and SC formation. These adaptations were driven by an overall increase in  
611 mitochondrial content, consistent with previous observations<sup>9,16-18</sup>. However, using our  
612 strategy to normalise for changes in mitochondrial content we have unravelled an intricate  
613 and previously undemonstrated network of differentially prioritised mitochondrial  
614 adaptations; this demonstrated that training-induced changes in individual proteins, functional  
615 classes, and metabolic pathways are not stoichiometrically linked to the overall training-  
616 induced increase in mitochondrial content. Moreover, we provide evidence that the lack of  
617 stoichiometry and the differential prioritisation extended to all three levels (i.e., the  
618 transcriptome, proteome, and lipidome; Fig. 3a, 5, and 4e, respectively). This lack of  
619 stoichiometry was also evident between the levels investigated (e.g., between training-  
620 induced changes in the proteome and lipidome); while the largest number of changes in  
621 proteins took place early (post-NVT, Fig. 4b), no changes in lipid species were reported at  
622 this time point, rather occurring later in the intervention (Supplementary Fig. 4a). Finally, we  
623 demonstrated that the training stimulus associated with the RVT phase was sufficient to  
624 maintain almost all mitochondrial adaptations (with the exception of some changes in lipids).  
625 However, a main trend towards a generalised decrease can be observed at all three levels  
626 investigated, confirming the plasticity of skeletal muscle mitochondria<sup>9</sup>. This suggests that,

627 although a short taper (one week) may be sufficient to preserve previous gains, longer periods  
628 of reduced training volume may indeed lead to a loss of mitochondrial adaptations<sup>9,18</sup>.

629 As our data indicated that biochemical techniques (differential centrifugation) can only  
630 enrich, but not purify, the mitochondrial extracts, we introduced a second (statistical)  
631 normalisation layer. This, in combination with the power of a multi-omics approach, removed  
632 the bias introduced by the overall training-induced increase in mitochondrial content and  
633 enabled us to unearth the elaborate and complex remodelling taking place within  
634 mitochondria. To the best of our knowledge, this is the first study investigating training-  
635 induced changes in individual proteins and protein functional classes relative to the overall  
636 increase in mitochondrial content. A striking and unexpected finding was the early (post-  
637 NVT) deprioritisation in the formation of OXPHOS subunits. This suggests that exercise  
638 training induces an increase in the biogenesis and proliferation of mitochondria that is greater  
639 than the increase in the components of the OXPHOS machinery. Despite this deprioritisation  
640 of OXPHOS subunits, mitochondrial respiration was enhanced with training - a feature that  
641 was likely supported by the inherent reserve capacity of mitochondria (i.e., their ability to  
642 respond to sudden increases in energy requirements)<sup>70</sup>. This could also be explained by the  
643 lengthy time requirements necessary to assemble large multi-protein complexes<sup>51</sup>;  
644 nonetheless, this is unlikely, as the relative amount of OXPHOS subunits remained reduced  
645 throughout the intervention, which lasted several weeks. The deprioritisation of OXPHOS  
646 subunits becomes even more striking when considering that both TCA cycle and FAO  
647 processes, two of the main suppliers of reducing equivalents to the OXPHOS system, were  
648 upregulated early (post-NVT) and remained upregulated throughout. This is consistent with  
649 the presence of a mitochondrial reserve capacity in human skeletal muscle of healthy  
650 individuals<sup>70</sup> and indicates that enhancing electron flow to OXPHOS is more important to  
651 increase ATP production than an increase in the components of the OXPHOS machinery.

652 This seems to also be confirmed by the relative decrease in proteins important for both CoQ  
653 biosynthesis and cristae formation (Fig. 5). Finally, the stoichiometric relationship between  
654 training-induced changes in OXPHOS SCs and mitochondrial content, which led to  
655 unchanged mt-specific mitochondrial respiration, adds to the growing evidence suggesting  
656 that SC formation does not confer enhancements in mitochondrial bioenergetics<sup>28</sup>, at least not  
657 in human skeletal muscle of young individuals, as has been previously suggested<sup>27</sup>.

658 In conclusion, our research demonstrates a complex network of non-stoichiometric  
659 mitochondrial adaptations to exercise training and highlights the elaborate and multi-layered  
660 nature of the adaptive response to exercise. This complexity was the result of changes in only  
661 one of the several programming variables of the exercise prescription (i.e., training volume).  
662 Future research utilising a similar approach is required to investigate the effects of  
663 manipulating other programming variables (e.g., exercise intensity, frequency, recovery  
664 between sessions) and the type of exercise (e.g., cycling, running, swimming, resistance  
665 training). These interventions are likely to induce adaptations that are specific and most likely  
666 different from the one presented in this research. Because of the well-documented therapeutic  
667 benefits of exercise training<sup>71,72</sup>, the knowledge generated by our novel findings, which are  
668 readily available in supplemental tables, together with the results from future research, could  
669 subsequently be mined by medical practitioners and physicians. This would provide a  
670 valuable resource on how to manipulate exercise programming variables to tailor make  
671 programs aimed at obtaining specific mitochondrial adaptations in a personalised manner.



## 672 **Methods**

673 ***Participants and ethics approval.*** Ten healthy men volunteered to take part in this study  
674 (physiological and performance parameters are presented in Supplementary Table 1).  
675 Potential participants were deemed suitable if aged 18-35 y, were moderately-trained (i.e.,  
676 less than 4 h per week of unstructured aerobic activity for half a year prior to the study), not  
677 regularly engaged in cycling-based sports, and were non-smokers and medication free prior  
678 to and during the study. Participants underwent a medical screening to exclude conditions  
679 that may have precluded their participation (e.g., cardiovascular, musculoskeletal and/or  
680 metabolic problems), and were informed of the study requirements, risks, and benefits, before  
681 giving written informed consent. Approval for the study's procedures, which conformed to  
682 the standards set by the latest revision of the Declaration of Helsinki, was granted by the  
683 Victoria University Human Research Ethics Committee (HRE15-126).

684 ***Study design.*** The study consisted of three consecutive training phases: the normal- (NVT),  
685 high- (LVT), and reduced- (RVT) training volume phase (Fig. 1a). Each training phase was  
686 preceded (and followed) by performance testing, which included a 20-km cycling time trial  
687 (20k-TT), a graded exercise test (GXT) (participants were previously familiarised with both  
688 tests), and a resting muscle biopsy. Overall study duration was ~9 weeks.

689 ***Testing procedures.*** Participants were required to avoid any vigorous exercise for the 48 h  
690 preceding each performance test (72 h for the skeletal muscle biopsy), from alcohol and any  
691 exercise for 24 h before testing, and from food and caffeine consumption for the 2 h  
692 preceding each test. Similar tests were performed at the same time of the day throughout the  
693 study to avoid variations caused by changes in circadian rhythm.

694 *GXT*. A graded exercise test was performed on an electronically-braked cycle ergometer  
695 (Lode Excalibur v2.0, Groningen, The Netherlands) to determine peak oxygen uptake  
696 ( $\dot{V}O_{2\text{Peak}}$ ), peak power output ( $\dot{W}_{\text{Peak}}$ ), the power attained at the lactate threshold ( $\dot{W}_{\text{LT}}$ ) using  
697 the modified  $D_{\text{Max}}$  method<sup>73</sup>, and the training intensity for each training phase. The test  
698 consisted of consecutive 4-min stages at constant power output; the test starting intensity  
699 (range: 45-77 W) and the intensity increase of each stage (range: 17-28 W) were chosen so as  
700 to obtain at least 8 time points for the determination of the  $\dot{W}_{\text{LT}}$ <sup>74</sup> and were based on  
701 participants' fitness levels. An identical protocol was used at all 4 time points for each  
702 participant. Prior to the test, and in the last 30 s of each stage, venous blood samples were  
703 taken for measurement of blood lactate concentration ( $[\text{La}^-]$ ). Participants were instructed to  
704 keep a cadence > 60 rpm and were only allowed access to cadence. The test was stopped  
705 when a participant reached volitional exhaustion or cadence dropped below 60 rpm for over  
706 10 s. The  $\dot{W}_{\text{Peak}}$  was determined as the power of the last completed stage plus an additional  
707 25% of the stage increase wattage for every additional minute completed. At the end of each  
708 *GXT*, after a 5-min recovery, a verification exhaustive bout was performed at an intensity  
709 equivalent to  $\dot{V}O_{2\text{Peak}}$  to confirm the highest measured  $\dot{V}O_{2\text{Peak}}$ <sup>74</sup>

710 *20k-TT*. Cycling time trials were performed on an electronically-braked cycle ergometer  
711 (Velotron, RacerMate, Seattle, WA, USA) after a 6-min cycling warm-up (4 min at 66% of  
712  $\dot{W}_{\text{LT}}$  followed by 2 min at  $\dot{W}_{\text{LT}}$ ), and 2 min of rest. Participants were only allowed access to  
713 cadence and completed distance.

714 *Gas Analysis during the GXT*. During the *GXT*, expired air was continuously analysed for  $O_2$   
715 and  $CO_2$  concentrations via a gas analyser (Moxus 2010, AEI Technologies, Pittsburgh, PA,  
716 USA), which was calibrated immediately before each test.  $\dot{V}O_2$  values were recorded every  
717 15 s and the average of the two highest consecutive 15-s values was recorded as a

718 participant's  $\dot{V}O_{2\text{Peak}}$ .

719 *Venous blood sampling.* Venous blood samples (~1 mL) were collected during the GXT from  
720 a cannula inserted in the antecubital vein for the determination of venous blood  $[\text{La}^-]$  using a  
721 blood-lactate analyser (2300 STAT Plus; YSI, Yellow Spring, OH, USA).

722 *Muscle biopsies.* A biopsy needle with suction under local anaesthesia (1% xylocaine) was  
723 used to obtain vastus lateralis muscle biopsies at rest at the following four time points: BL,  
724 PN, PH and PR. After being cleaned of excess blood, connective and fat tissue muscle  
725 biopsies were divided as follows: ~10 mg was immediately immersed in ~2 mL of ice-cold  
726 BIOPS for measurements of mitochondrial respiration, whereas the remainder was promptly  
727 frozen in liquid nitrogen and stored at  $-80^\circ\text{C}$  for follow-up analyses.

728 ***Training intervention.*** All training sessions were performed on an electronically braked  
729 cycle ergometer (Velotron, RacerMate, USA), following an 8-min warm up (see 20k-TT) and  
730 consisted of HIIT (2:1 work-to-rest ratio). Training intensity was set relative to  $\dot{W}_{\text{LT}}$  (rather  
731 than  $\dot{W}_{\text{Peak}}$ ) so as to induce similar metabolic and cardiac stresses amongst participants of  
732 differing fitness levels<sup>75</sup>. Exercise intensity was maintained between  $\dot{W}_{\text{LT}}$  and  $\dot{W}_{\text{Peak}}$   
733 throughout the entire study so that training volume was the only manipulated variable  
734 between the 3 phases.

735 *NVT phase.* This consisted of 6 HIIT sessions within 2 weeks of 5 to 7 4-min cycling  
736 intervals interspersed with a 2-min recovery at 60 W. Exercise intensities were defined as  
737  $[\dot{W}_{\text{LT}} + x(\dot{W}_{\text{Peak}} - \dot{W}_{\text{LT}})]$ , with  $x$  increasing from 0.5 to 0.7 throughout the phase.

738 *HVT phase.* Participants performed HIIT twice a day for 20 consecutive days; training  
739 sessions consisted of either 7 to 10 4-min intervals interspersed with a 2-min recovery at 60

740 W at intensities ranging from  $[\dot{W}_{LT} + 0.5(\dot{W}_{Peak} - \dot{W}_{LT})]$  to  $[\dot{W}_{LT} + 0.8(\dot{W}_{Peak} - \dot{W}_{LT})]$ , or 15 to 20  
741 2-min intervals at intensities ranging from  $[\dot{W}_{LT} + 0.5(\dot{W}_{Peak} - \dot{W}_{LT})]$  to  $[\dot{W}_{LT} + 0.95(\dot{W}_{Peak} -$   
742  $\dot{W}_{LT})]$ , interspersed with a 1-min recovery at 60 W. Single session duration increased from  
743 ~45 min to 60 min.

744 *RVT phase.* The RVT phase consisted of 6 HIIT sessions in 6 days; participants performed  
745 10, 9, 8, 7, 6, and 4, 4-min intervals interspersed with a 2-min recovery at 60 W, at an  
746 intensity of  $[\dot{W}_{LT} + x(\dot{W}_{Peak} - \dot{W}_{LT})]$ , with  $x$  increasing from 0.5 to 0.7 throughout the phase.

747 ***Physical activity and nutritional control.*** Physical activity and dietary patterns were  
748 maintained throughout the study and were monitored with the use of food and physical  
749 activity recall diaries. The last 3 meals prior to each performance test undertaken during  
750 baseline testing were recorded by each participant and were replicated thereafter before the  
751 same type of test. To control for dietary effects on muscle metabolism, participants were  
752 provided with a standardised dinner (55 kJ kg<sup>-1</sup> body mass (BM), providing 2.1 g  
753 carbohydrate (CHO) kg<sup>-1</sup> BM, 0.3 g fat kg<sup>-1</sup> BM, and 0.6 g protein kg<sup>-1</sup> BM) and breakfast  
754 (41 kJ kg<sup>-1</sup> BM, providing 1.8 g CHO kg<sup>-1</sup> BM, 0.2 g fat kg<sup>-1</sup> BM, and 0.3 g protein kg<sup>-1</sup> BM),  
755 to be consumed 15 and 3 h prior to the muscle biopsy, respectively.

## 756 ***Muscle analyses***

757 *Enzymatic activity.* Enzyme activities were determined spectrophotometrically in post-600g  
758 supernatants of skeletal muscle homogenates according to the method described for  
759 respiratory chain complexes I-IV and citrate synthase<sup>76</sup>. Briefly, ~20mg of skeletal muscle  
760 sample was homogenized in sucrose/mannitol containing buffer using a glass/glass  
761 homogenizer and spun for 10 min at 600 g and 4 °C. The supernatant was then subjected to  
762 two freeze/thaw cycles and stored at -80 °C until measurement of respiratory chain enzymes.

763 CI was assayed as rotenone-sensitive NADH:CoQ1 oxidoreductase by monitoring the  
764 decrease in absorbance due to NADH oxidation at 340 nm. For CII, activity was measured as  
765 succinate:CoQ1 oxidoreductase by measuring CoQ1 reduction at 280 nm. CIII was assayed  
766 as decylbenzylquinol; cytochrome *c* oxidoreductase by following the increase in absorbance  
767 resulting from cytochrome *c* reduction at 550 nm. CIV was measured as cytochrome *c*  
768 oxidase by following the decrease in absorbance resulting from cytochrome *c* oxidation at  
769 550 nm. To assay the CS catalysed production of coenzyme A (CoA.SH) from oxaloacetate,  
770 the generation of free sulfhydryl groups was monitored using the thiol reagent 5,5'-dithio-bis-  
771 (2-nitrobenzoic acid) (DTNB), which reacts spontaneously with the sulfhydryl groups to  
772 produce 5-thio-2-nitrobenzoate anions. CS specific activity was measured by following the  
773 increase in absorbance resulting from the formation of 5-thio-2 nitrobenzoate anions at  
774 412nm. Following the enzyme measurements, the amount of protein in each sample was  
775 determined using a bicinchoninic acid assay and activity calculated as initial rates (complexes  
776 I, II and citrate synthase) or as first-order rate constants (complexes III and IV).

777 *Preparation of whole-muscle lysates for SDS-PAGE assessment of ETC subunits.* Frozen  
778 skeletal muscle samples (~10 mg) were homogenised in a TissueLyzer for 2x 2 min at  
779 maximum speed in ice-cold lysis buffer (1:20 w/v) containing 50 mM Tris-HCl, 150 mM  
780 NaCl, 1 mM EDTA, 1% NP-40 and a phosphatase/protease inhibitor (5872, Cell Signaling  
781 Technology, Danvers, MA, USA). Homogenates were rotated end-over-end at 4 °C for 1 h  
782 and protein concentration was determined in triplicate using a commercial colorimetric assay  
783 (Bio-Rad Protein Assay kit-II, Australia).

784 *Mitochondrial isolation for SDS- and BN-PAGE assessment of ETC subunits, complexes and*  
785 *SCs.* Frozen skeletal muscle samples (~30 mg) were homogenised with 2x 20 strokes in a  
786 Potter-Elvehjem tissue grinder attached to a rotating drill (~1000 rpm) in 5 mL solution A (1

787 mM EDTA, 220 mM mannitol, 20 mM HEPES-KOH [pH=7.6], 70 mM sucrose, 2 mg/mL  
788 BSA, 0.5 mM PMSF) and spun at 800 g for 5 min at 4°C. The supernatant was collected,  
789 whereas the pellet was re-homogenised as above in 5 mL of solution A to maximise  
790 extraction. The two supernatants were mixed and further spun at 800 g for 5 min at 4°C. The  
791 ensuing supernatant was then spun at 10,000 g for 20 min at 4°C, and the pellet was  
792 resuspended in 200 uL of sucrose buffer (0.5 M sucrose, 10 mM HEPES-KOH [pH=7.6], 0.5  
793 mM PMSF). Protein concentration was determined by the bicinchoninic acid method  
794 according to the manufacturer's instructions (BCA Protein Assay Kit, Pierce-Thermo Fisher  
795 Scientific, Melbourne, Australia). This measurement was used to generate Fig. 1c.

796 *SDS-PAGE*. Both whole-muscle lysates (7.5 µg) and mitochondrial isolates (5 µg) were  
797 separated by electrophoresis using 12 or 15% SDS-PAGE gels, as previously described<sup>77</sup>, and  
798 blotted with a total OXPHOS (ab110411, Abcam, Cambridge, MA, USA) or with a single CI  
799 (ab110242, Abcam, Cambridge, MA, USA) antibody where separation with CIV was not  
800 optimal using the total OXPHOS antibody.

801 *BN-PAGE*. Mitochondrial isolates (6-15 µg) were separated by electrophoresis using 3-12%  
802 NativePAGE gels (Life Technologies Australia, Mulgrave, Australia) as previously  
803 described<sup>78</sup>. A 4 g/g digitonin/protein ratio was used for assessment of SCs. The following  
804 primary antibodies were used: NADH:ubiquinone oxidoreductase subunit A9 (NDUFA9;  
805 ab14713), ubiquinol-cytochrome *c* reductase core protein 2 (UQCRC2; ab14745),  
806 cytochrome *c* oxidase subunit IV (COX IV; ab14744) (all Abcam, Cambridge, MA, USA).

807 For both SDS- and BN-PAGE, protein bands were visualised using a Bio-Rad ChemiDoc  
808 imaging system and bands were quantified using Bio-Rad Image Lab 5.0 software (Bio-Rad  
809 laboratories, Gladesville, NSW, Australia). An internal standard (made of a mixture of all

810 samples) was loaded in each SDS- and BN-PAGE gel, and each lane was normalised to this  
811 value, to reduce gel-to-gel variability.

812 *Fibre preparation for high-resolution respirometry.* Fresh muscle fibres were mechanically  
813 separated in ice-cold BIOPS (in mM: 2.77 CaK<sub>2</sub>EGTA, 7.23 K<sub>2</sub>EGTA, 5.77 Na<sub>2</sub>ATP, 6.56  
814 MgCl<sub>2</sub>, 20 taurine, 50 MES, 15 Na<sub>2</sub>phosphocreatine, 20 imidazole and 0.5 dithiothreitol  
815 adjusted to pH 7.1<sup>11</sup>, followed by permeabilization by gentle agitation for 30 min at 4°C in  
816 BIOPS containing 50 µg/mL of saponin, and 3 5-min washes in MiR05 (in mM, unless  
817 specified: 0.5 EGTA, 3 MgCl<sub>2</sub>, 60 K-lactobionate, 20 taurine, 10 KH<sub>2</sub>PO<sub>4</sub>, 20 HEPES, 110  
818 sucrose and 1 g/L BSA essentially fatty acid-free, pH 7.1)<sup>11</sup>. Mitochondrial respiration was  
819 measured in duplicate (from 2-3 mg wet weight of muscle fibres) in MiR05 at 37°C using the  
820 high-resolution Oxygraph-2k (Oroboros, Innsbruck, Austria). To avoid potential oxygen  
821 diffusion limitation, oxygen concentration was maintained between 270 and 480 nmol mL<sup>-1</sup>  
822 by re-oxygenation via direct syringe injection of O<sub>2</sub>.

823 *Mitochondrial respiration protocol.* The substrate-uncoupler-inhibitor titration (SUIT)  
824 protocol<sup>11</sup> used was as follows: 0.2 mM octanoylcarnitine and 2 mM malate ([ETF]<sub>L</sub>: leak  
825 respiration state [L] in the absence of adenylates and limitation of flux by electron input  
826 through electron transfer flavoprotein [ETF]); 3 mM MgCl<sub>2</sub> and 5 mM ADP ([ETF]<sub>P</sub>:  
827 maximal OXPHOS capacity [P] with saturating levels of ADP and limitation of flux by  
828 electron input through ETF); 5 mM pyruvate ([ETF+CI]<sub>P</sub>: P with saturating levels of ADP  
829 and limitation of flux by convergent electron input through ETF + CI); 10 mM succinate  
830 ([ETF+CI+II]<sub>P</sub>: P with saturating levels of ADP and limitation of flux by convergent electron  
831 input through ETF + CI + CII); 10 µM cytochrome *c* (outer mitochondrial membrane  
832 integrity test); 0.75-1.5 µM carbonyl cyanide 4-(trifluoromethoxy) phenylhydrazone (FCCP)  
833 via stepwise titration ([ETF+C+II]<sub>E</sub>, maximal electron transport chain capacity [E] with

834 saturating levels of ADP and limitation of flux by convergent electron input through ETF +  
835 CI + CII); 0.5  $\mu\text{M}$  rotenone ([CII]<sub>E</sub>: E with saturating levels of ADP and limitation of flux by  
836 electron input through CII); 5  $\mu\text{M}$  antimycin A (residual non-mitochondrial oxygen  
837 consumption [ROX]). Data are presented as mass-specific mitochondrial respiration [ $\text{pmol O}_2$   
838  $\text{s}^{-1} \text{mg}^{-1}$  wet weight] and as mitochondrial-specific respiration [ $\text{pmol O}_2 \text{s}^{-1} \text{mg}^{-1}$  wet  
839 weight/CS activity].

840 *RNA-seq analysis.* Approximately 10 to 15 mg of frozen muscle was used to isolate RNA  
841 using the RNeasy Mini Kit (Qiagen, Canada) according to the manufacturer's instructions.  
842 Samples were homogenised using the TissueLyser II (Qiagen, Canada). RNA concentration  
843 and purity were determined spectrophotometrically (NanoDrop 2000, Thermo Fisher  
844 Scientific, Wilmington, DE, USA) at 260 and 280 nm. RNA integrity was assessed using an  
845 Agilent Bioanalyzer according to manufacturer's instructions. The RNA was stored at  $-80^\circ\text{C}$ .

846 *Sequencing and assembly of RNA-seq.* This analysis was conducted on  $n = 5$  participants (20  
847 samples in total); samples were sequenced (100 base pair, single reads) on the Illumina  
848 NovaSeq 6000 platform at the Australian Genome Research Facility (AGRF). Transcriptome  
849 assembly was completed at AGRF with reads screened for presence of any Illumina  
850 adapter/overrepresented sequences and cross-species contamination. Per base sequence  
851 quality for all samples was  $>96\%$  bases above Q30. Cleaned sequence reads were aligned  
852 against the *Homo sapiens* genome (Build version HG38). The STAR aligner (v2.5.3a) was  
853 used to map reads to the genomic sequences. Count of read mapping to each known gene  
854 were summarised to provide the matrix used for further analysis.

855 *Bioinformatic analysis of RNA-seq data.* For downstream RNA-seq analysis the R package  
856 *limma*<sup>79</sup> was used to conduct the differential expression analysis from count data. Count data



857 was normalised using calcNormFactors in the *edgeR* package in R. Differential expression  
858 analysis was performed between each subsequent biopsy to show comparative changes  
859 between each of the training volumes, though all comparisons were accounted for within the  
860 analysis. The resulting differential expression values were filtered for an adjusted *P* value <  
861 0.05 using the Benjamini Hochberg method. Heatmaps were visualised using hierarchical  
862 clustering using the “average” method. Categorical columns for the generation of Fig. 3a  
863 were determined by identifying the transcripts to known descriptions in the literature;  
864 MICOS<sup>80</sup>, TCA cycle<sup>81</sup>, SLC25A<sup>47</sup>, Assembly Factors<sup>82</sup>. All differentially expressed  
865 transcripts were run through Enrichr (<https://maayanlab.cloud/Enrichr/><sup>83,84</sup>) and the top  
866 biological processes were identified with a combined score sorting for Fig. 3c.

867 *Mitochondrial isolation for proteomics and lipidomics assessment.* Frozen skeletal muscle  
868 samples (~30 mg) were homogenised with 2x 20 strokes in a Potter-Elvehjem tissue grinder  
869 attached to a rotating drill (~1000 rpm) in 3 mL solution B (1 mM EDTA, 220 mM mannitol,  
870 20 mM HEPES-KOH [pH=7.6], 70 mM sucrose, 0.5 mM PMSF) and spun at 1000 g for 5  
871 min at 4°C. The supernatant was further spun at 12000 g for 10 min at 4°C, and the ensuing  
872 pellet was resuspended in 200 µL of sucrose buffer (0.5 M sucrose, 10 mM HEPES-KOH  
873 [pH=7.6]). Protein concentration was determined by the bicinchoninic acid method according  
874 to the manufacturer’s instructions (BCA Protein Assay Kit, Pierce-Thermo Fisher Scientific,  
875 Melbourne, Australia). Two IM fractions per sample (50 µg each) were were spun at 12000 g  
876 for 10 min at 4°C; after removal of the supernatant, the pellets were stored frozen at -80°C  
877 for subsequent proteomics and lipidomics analysis.

878 *Proteomics.* IM fractions were prepared for proteomics analysis as previously described<sup>85</sup>  
879 with minor modifications. Briefly, 50 µg of frozen mitochondrial isolates were solubilised in  
880 20 µL of 8 M urea, 40 mM chloroacetamide, 10 mM tris(2-carboxyethyl)phosphine, 100 mM

881 Tris, pH 8.1; this was followed by 15 min of sonication in a water bath sonicator and 30 min  
882 of shaking (1500 rpm, at 37°C). The urea concentration was reduced to 2 M with H<sub>2</sub>O prior  
883 to protein digestion with trypsin (Promega, Alexandria, NSW, Australia) at a 1:60  
884 trypsin:protein ratio and subsequent overnight digestion at 37°C. The next day, samples were  
885 acidified with trifluoroacetic acid (1% [v/v] final concentration) and centrifuged for 5 min at  
886 20,100 g at RT. The supernatants were desalted on pre-activated (100% acetonitrile [ACN])  
887 and pre-equilibrated (0.1% TFA, 2% ACN) styrene divinylbenzene (SDB-XC; Supelco,  
888 Merck, Bayswater, VIC, Australia) stage tips<sup>86</sup> made in-house, before being washed (0.1%  
889 TFA, 2% ACN) and eluted in 0.1% TFA, 80% ACN. Samples were concentrated under  
890 vacuum and reconstituted in 0.1% TFA, 2% ACN. After 15 min sonication and subsequent  
891 vortexing samples were centrifuged at 20,100 g at RT before estimation of peptide  
892 concentration (Direct Detect, Merck). Approximately 600-800 ng of peptides were analysed  
893 on a Thermo Q Exactive™ Plus mass spectrometer coupled to an Ultimate 3000 HPLC (both  
894 Thermo Fisher Scientific, Mulgrave, VIC, Australia). Peptides were first loaded onto a trap  
895 column (Dionex-C18, 100 Å, 75 µm x 2 cm; Thermo Fisher Scientific) at an isocratic flow of  
896 5 µL min<sup>-1</sup> of 2% (v/v) ACN containing 0.1 % (v/v) formic acid (FA) for 5 min before  
897 switching the trap-column in line with the analytical column (Dionex-C18, 100 Å, 75 µm x  
898 50 cm; Thermo Fisher Scientific). The separation of peptides was performed at  
899 300 nL min<sup>-1</sup> using a nonlinear ACN gradient of buffer A (2% ACN, 0.1% FA) and buffer B  
900 (80% ACN, 0.1% FA) over 125 min including void and equilibration. Data were collected in  
901 positive mode using Data Dependent Acquisition using m/z 375–1400 as MS scan range,  
902 HCD for MS/MS of the 15 most intense ions with  $z \geq 2$ . Other instrument parameters were:  
903 MS1 scan at 70,000 resolution (at 200 m/z), MS maximum injection time 50 ms, AGC target  
904 3e6, stepped normalised collision energy of 27, 30, 32, isolation window of 1.6 m/z, MS/MS

905 resolution 17,500, MS/MS AGC target of 5e4, MS/MS maximum injection time 50 ms,  
906 minimum intensity was set at 2e3 and dynamic exclusion was set to 30 s.

907 Raw files were analysed using the MaxQuant platform<sup>87</sup> version 1.6.1.0, searching against the  
908 Uniprot human database containing reviewed, canonical variants in FASTA format (June  
909 2018) and a database containing common contaminants by the Andromeda search engine<sup>88</sup>.  
910 Default search parameters for a label free quantification (LFQ) experiment were used with  
911 modifications. In brief, “Label free quantification” was set to “LFQ” using a minimum ratio  
912 count of 2. Cysteine carbamidomethylation was used as a fixed modification, and N-terminal  
913 acetylation and methionine oxidation were used as variable modifications. False discovery  
914 rates of 1% for proteins and peptides were applied by searching a reverse database, and  
915 ‘match from and to’, ‘match between runs’ options were enabled with a match time window  
916 of 0.7 min. Unique and razor peptides with a minimum ratio count of 2 were used for  
917 quantification.

918 *Bioinformatic analysis of proteomics data.* The R package *limma*<sup>79</sup> was used to conduct the  
919 differential expression analysis of MaxQuant LFQ intensities (extracted from  
920 proteinGroups.txt) after first performing normalisation using variance stabilising  
921 normalisation (VSN) as found in the *limma* package. Identifications labelled by MaxQuant as  
922 ‘only identified by site’, ‘reverse’ and ‘potential contaminant’ were removed. Proteins having  
923 less than 70% valid values were removed and remaining missing data was imputed using  
924 QRILC method from the *imputeLCMD* package in R<sup>89</sup>. Differential expression analysis was  
925 performed between BL and then each subsequent time point to show comparative changes  
926 between each of the training volumes, though all comparisons were accounted for within the  
927 analysis. Linear modelling was determined using eBayes in the *limma* package. The resulting  
928 differential expression values were filtered for an adjusted *P* value < 0.01 using the

929 Benjamini Hochberg method. For the mitochondrial normalisation, all “Known  
930 Mitochondrial” proteins identified using the Integrated Mitochondrial Protein Index (IMPI)<sup>8</sup>  
931 were subset from the rest of the dataset, and then followed the normalisation and statistical  
932 validation as described above. Heatmaps were produced using hierarchical clustering using  
933 the “complete” method. Gene ontology of the clusters was determined by taking the proteins  
934 identified in the cluster and performing an enrichment analysis using the ClueGO (v2.5.6)  
935 application in Cytoscape (v3.7.1) using default settings except for a GO tree interval of 3 to  
936 5, with only the Biological Processes Ontology switched on (Fig. 3d and Supplementary Fig.  
937 3b). Full tables of identified proteins and post-normalisation differentially expressed proteins  
938 in their respective clusters and their annotations can be found in Supplementary Table 4 to 8.

939 The heatmaps presented in Fig. 5 and discussed in the Results section were generated  
940 according to Reactome pathways and/or literature searches (Supplementary Table 7). Proteins  
941 involved in two or more pathways were either presented in both pathways, or were assigned  
942 to the pathway involving the protein’s primary function and/or most closely matching their  
943 training-induced changes. Specifically, "mitochondrial translation" was based on Reactome  
944 pathway R-HSA:5368287 (Mitochondrial translation). "TCA cycle" was based on Reactome  
945 pathway "R-HSA:71403 (Citric acid cycle [TCA cycle]); NNT was removed because its main  
946 physiological function is the generation of NADPH<sup>90</sup>. "FAO" was based on Reactome  
947 pathway R-HSA:556833 (Metabolism of Lipids); ETFA<sup>91</sup>, ETFB<sup>91</sup>, HSD17B10<sup>92</sup>, and  
948 PLIN5<sup>45</sup> were added based on their involvement with FAO and lipid metabolism; GPD2<sup>48,93</sup>,  
949 GPX1 (R-HSA-3299685 and<sup>49</sup>), and GPX4<sup>49</sup> were not presented within this pathway as their  
950 primary function suggested their inclusion in different pathways of Fig. 5; SAR1B was  
951 removed because its main function is the regulation of vesicle budding<sup>94</sup>. "OXPHOS” was  
952 based on Reactome pathway R-HSA:1632000 (Respiratory electron transport, ATP synthesis  
953 by chemiosmotic coupling, and heat production by uncoupling proteins); ETFA<sup>91</sup>, ETFB<sup>91</sup>,

954 ETFDH<sup>48</sup>, TRAP1<sup>52</sup>, and CYCS (R-HSA-3299685) were not presented within this pathway  
955 as their primary function and/or training-induced changes suggested their inclusion in  
956 different pathways of Fig. 5 was more appropriate; based on the main function of its  
957 constituent proteins the “OXPHOS” pathway was then subdivided in 2 subgroups:  
958 “OXPHOS - subunits”, to which MP68<sup>95</sup> was added, and “OXPHOS - Assembly factors” to  
959 which ATPAF1<sup>12</sup>, BCS1L<sup>12</sup>, and COA3<sup>12</sup> were added. “Response to ROS” was based on  
960 Reactome pathway: R-HSA-3299685 (Detoxification of Reactive Oxygen Species); GPX4  
961 was added based on its ability to reduce H<sub>2</sub>O<sub>2</sub><sup>49</sup>. “Protein Folding” was based on literature  
962 searches: TRAP1, HSPA9, HSPD1, HSPE1, and TIMM44 were all added based on their  
963 involvement in protein folding and quality control mechanisms<sup>52</sup>. “CoQ biosynthesis” was  
964 based on Reactome pathway R-HSA-2142789 (Ubiquinol biosynthesis). “CoQ e- donors”  
965 was based on literature searches: DHODH<sup>48</sup>, ETFDH<sup>48</sup>, GPD2<sup>48</sup>, IVD<sup>61</sup>, DLD<sup>62</sup> and  
966 L2HGDH<sup>63</sup>, were all added based on their function to feed electrons into the respiratory chain  
967 via CoQ. “Cristae formation” was based on Reactome pathway R-HSA-8949613 (Cristae  
968 formation); OMA1<sup>66,67</sup> was added based on its involvement in cristae formation, whereas  
969 ATP5A1, ATP5J, ATP5B, ATP5H, and ATP5O (all based on R-HSA:163200), as well as  
970 HSPA9<sup>52</sup> were not presented within this pathway as their primary function suggested their  
971 inclusion in different pathways of Fig. 5.

972 *Lipid extraction for lipidomics.* Mitochondrial isolates were extracted using a modified  
973 single-phase chloroform/methanol extraction as described previously<sup>96</sup>. In brief, 20 volumes  
974 of chloroform:methanol (2:1) were added to the sample along with a series of internal  
975 standards. Samples were vortexed and centrifuged on a rotary mixer for 10 min. Following  
976 sonication on a sonicator bath for 30 min, samples were rested for 20 min prior to  
977 centrifugation at 13,000 g for 10 min. Supernatants were transferred into a 96 well plated,  
978 dried down and reconstituted in 50  $\mu$ L H<sub>2</sub>O saturated butanol and sonicated for 10 min. After

979 the addition of 50  $\mu$ L of methanol with 10 mM ammonium formate, samples were  
980 centrifuged at 4000 rpm on a plate centrifuge and transferred into glass vials with inserts for  
981 mass spectrometry analysis.

982 *Targeted lipidomics analysis.* LC-MS/MS was performed according to previously published  
983 methods, with slight modification for tissue samples<sup>97</sup>. Sample extracts were analysed using  
984 either (i) an AB Sciex Qtrap 4000 mass spectrometer coupled to an Agilent 1200 HPLC  
985 system for CL assessment, as described previously<sup>98</sup> or (ii) an Agilent 6490 QQQ mass  
986 spectrometer coupled with an Agilent 1290 series HPLC system for assessment of all other  
987 lipid species<sup>97</sup>. Lipids run on the Agilent 6490 were measured using scheduled multiple  
988 reaction monitoring with the following conditions: isolation widths for Q1 and Q3 were set to  
989 “unit” resolution (0.7 amu), gas temperature 150°C, nebulizer 20 psi, sheath gas temperature  
990 200°C, gas flow rate 17 L/min, capillary voltage 3500 V and sheath gas flow 10 L/min. The  
991 list of MRMs used and the chromatographic conditions were described previously<sup>97</sup>.

992 *Bioinformatic analysis of lipidomics data.* For lipidomics we identified that the increase in  
993 CLs in the un-normalised data was due to a training-induced increase in MPE in our  
994 mitochondrial isolates. To eliminate this bias, all lipid species were normalised by total CL  
995 amount (Supplementary Table 9). Lipid species were log transformed before undergoing  
996 differential expression analysis in *limma*<sup>79</sup>, with linear models using the eBayes function. The  
997 resulting differential expression values were filtered for an adjusted *P* value < 0.05 using  
998 Benjamini Hochberg method (Supplementary Table 10). Heatmaps were visualised using  
999 hierarchical clustering using the “complete” method. Profile plots were determined by taking  
1000 the mean of the z-score for all participants’ samples for each lipid species at each exercise  
1001 volume (Fig. 4f). Higher classes were determined through descriptions of the literature as  
1002 assigned by the Lipid Metabolites and Pathways Strategy (Lipid MAPS)<sup>99</sup>.

1003 **Statistical Analysis.** All values are reported as means  $\pm$  SD, unless otherwise specified. For  
1004 non-omics analyses: outliers were first removed using the ROUT method set at  $Q = 1\%^{100}$ .  
1005 Normally distributed datasets (Shapiro-Wilk test  $P > 0.05$ ) were analysed by a repeated  
1006 measures one-way ANOVA followed by Tukey's correction post hoc testing. Non-normally  
1007 distributed datasets (Shapiro-Wilk test  $P < 0.05$ ) were transformed using, in order,  $\log(Y)$ ,  
1008  $1/Y$ ,  $\sqrt{Y}$ , until normality was met, before being analysed as above; datasets that remained  
1009 non-normal following 3 independent transformation attempts were analysed using the non-  
1010 parametric Friedman test on the raw data followed by Dunn's correction post hoc testing. The  
1011 level of statistical significance was set a priori at  $P < 0.05$ . GraphPad Prism (v. 8.4.2) was  
1012 used for all statistical non-omics analyses.

1013 **Data availability.** The R scripts used for all omics analyses described above are deposited on  
1014 GitHub at <https://github.com/XercisOmics/EnduranceMitoMultiOmics>. Raw RNASeq and  
1015 mass-spectrometry data will be uploaded to NCBI, ProteomeXchange and Metabolomics  
1016 Workbench repositories upon publication.

1017 **Acknowledgments.** We thank the participants for their time and commitment to this study.  
1018 The authors would like to acknowledge all members of the Stroud and Bishop labs for input  
1019 into interpretation and presentation of data. We thank the Bio21 Mass Spectrometry and  
1020 Proteomics Facility (MMSPF) for provision of instrumentation, training, and technical  
1021 support. We acknowledge the use of the services and facilities of the Australian Genome  
1022 Research Facility (AGRF). This study was funded by grants from the ANZ-MASON  
1023 Foundation (to D.J.B), the Australian Research Council (Discovery Project DP140104165 to  
1024 D.J.B), the Australian National Health and Medical Research Council (NHMRC Project  
1025 Grant 1140906 to D.A.S.; NHMRC Fellowships 1140851 to D.A.S. and 1155244 to D.R.T.),  
1026 JDRF Australia (JDRF Career Development to M.T.C.), and the Australian Research Council  
1027 Special Research Initiative in Type 1 Juvenile Diabetes (to M.T.C.). We acknowledge the  
1028 support of the Mito Foundation for the provision of instrumentation and the Victorian  
1029 Government's Operational Infrastructure Support Program.

1030 **Author contributions.** C.G., D.A.S., and D.J.B. conceptualised the study. C.G., D.A.S., and  
1031 D.J.B. devised the study methodology. C.G., N.A.J., and H.A.J. performed study validation.  
1032 C.G., N.A.J, H.A.J. delivered the training and performed sample collection. C.G., J.B., J.K.,  
1033 B.R., A.L., T.L.S., and A.E.F. performed biochemical analyses. C.G., B.R., and D.A.S.,  
1034 performed proteomic analysis. K.H., and N.A.M. performed lipidomic analysis. RNA-seq  
1035 analysis was performed at the Australian Genome Research Facility (AGRF). C.G., N.J.C.,  
1036 and D.A.S. performed statistical and bioinformatic analysis. C.G., N.J.C., and D.A.S.  
1037 delivered the visualisation. C.G., D.A.S., and D.J.B. wrote the manuscript. M.T.C., P.J.M.,  
1038 D.R.T., D.A.S, and D.J.B. provided supervision. D.R.T., M.T.C., D.A.S, and D.J.B. funded  
1039 the research. C.G., D.A.S., and D.J.B. have primary responsibility for final content. Data  
1040 collection took place at Victoria University. Muscle analysis took place at Victoria  
1041 University, Monash University, Murdoch Children's Research Institute, the Baker Heart &



1042 Diabetes Institute, AGRF, and the Bio21 Molecular Science & Biotechnology Institute (The  
1043 University of Melbourne). All persons designated as authors qualify for authorship, and all  
1044 those qualifying for authorship are listed. All authors have read and approved the final  
1045 manuscript.

1046 **Competing interest.** The authors declare no conflict of interest.

1047 **References**

- 1048 1 Spinelli, J. B. & Haigis, M. C. The multifaceted contributions of mitochondria to  
1049 cellular metabolism. *Nat. Cell Biol.* **20**, 745-754 (2018).
- 1050 2 Gorman, G. S. *et al.* Mitochondrial diseases. *Nature reviews Disease primers* **2**, 1-22  
1051 (2016).
- 1052 3 Lin, M. T. & Beal, M. F. Mitochondrial dysfunction and oxidative stress in  
1053 neurodegenerative diseases. *Nature* **443**, 787-795 (2006).
- 1054 4 López-Otín, C., Blasco, M. A., Partridge, L., Serrano, M. & Kroemer, G. The  
1055 hallmarks of aging. *Cell* **153**, 1194-1217 (2013).
- 1056 5 Nunnari, J. & Suomalainen, A. Mitochondria: in sickness and in health. *Cell* **148**,  
1057 1145-1159, doi:10.1016/j.cell.2012.02.035 (2012).
- 1058 6 Holloszy, J. O. Biochemical adaptations in muscle. Effects of exercise on  
1059 mitochondrial oxygen uptake and respiratory enzyme activity in skeletal muscle. *J.*  
1060 *Biol. Chem.* **242**, 2278-2282 (1967).
- 1061 7 Hoppeler, H., Lüthi, P., Claassen, H., Weibel, E. R. & Howald, H. The ultrastructure  
1062 of the normal human skeletal muscle. *Pflügers Archiv* **344**, 217-232,  
1063 doi:10.1007/bf00588462 (1973).
- 1064 8 Smith, A. C. & Robinson, A. J. MitoMiner v4. 0: an updated database of  
1065 mitochondrial localization evidence, phenotypes and diseases. *Nucleic Acids Res.* **47**,  
1066 D1225-D1228 (2019).
- 1067 9 Granata, C., Jamnick, N. A. & Bishop, D. J. Training-induced changes in  
1068 mitochondrial content and respiratory function in human skeletal muscle. *Sports Med.*  
1069 **48**, 1809–1828 (2018).
- 1070 10 Granata, C., Jamnick, N. A. & Bishop, D. J. Principles of exercise prescription, and  
1071 how they influence exercise-induced changes of transcription factors and other  
1072 regulators of mitochondrial biogenesis. *Sports Med.* **48**, 1541–1559 (2018).
- 1073 11 Pesta, D. & Gnaiger, E. in *Mitochondrial Bioenergetics: Methods and Protocols* Vol.  
1074 810 (eds Carlos M. Palmeira & Antonio J. Moreno) 25-58 (Springer  
1075 Science+Business Media, 2012).
- 1076 12 Signes, A. & Fernandez-Vizarra, E. Assembly of mammalian oxidative  
1077 phosphorylation complexes I–V and supercomplexes. *Essays Biochem.* **62**, 255-270  
1078 (2018).
- 1079 13 Greggio, C. *et al.* Enhanced respiratory chain supercomplex formation in response to  
1080 exercise in human skeletal muscle. *Cell Metab.* **25**, 301-311 (2017).
- 1081 14 Wyckelsma, V. L. *et al.* Preservation of skeletal muscle mitochondrial content in  
1082 older adults: relationship between mitochondria, fibre type and high-intensity exercise  
1083 training. *The Journal of physiology* **595**, 3345-3359 (2017).

- 1084 15 Ørtenblad, N. Mitochondrial increase in volume density with exercise training: More,  
1085 larger or better? *Acta Physiologica* **222**, e12976 (2018).
- 1086 16 Bishop, D. J. *et al.* High-Intensity Exercise and Mitochondrial Biogenesis: Current  
1087 Controversies and Future Research Directions. *Physiology* **34**, 56-70,  
1088 doi:10.1152/physiol.00038.2018 (2019).
- 1089 17 Bishop, D. J., Granata, C. & Eynon, N. Can we optimise the exercise training  
1090 prescription to maximise improvements in mitochondria function and content?  
1091 *Biochim. Biophys. Acta, Gen. Subj.* **1840**, 1266-1275 (2014).
- 1092 18 Granata, C., Oliveira, R. S. F., Little, J. P., Renner, K. & Bishop, D. J. Mitochondrial  
1093 adaptations to high-volume exercise training are rapidly reversed after a reduction in  
1094 training volume in human skeletal muscle. *FASEB J.* **30**, 3413-3423,  
1095 doi:10.1096/fj.201500100R (2016).
- 1096 19 Larsen, S. *et al.* Biomarkers of mitochondrial content in skeletal muscle of healthy  
1097 young human subjects. *J. Physiol.* **590**, 3349-3360 (2012).
- 1098 20 Barnard, R. J., Edgerton, V. R. & Peter, J. Effect of exercise on skeletal muscle. I.  
1099 Biochemical and histochemical properties. *J. Appl. Physiol.* **28**, 762-766 (1970).
- 1100 21 Golinick, P. D., Ianuzzo, C. D. & King, D. W. in *Muscle metabolism during exercise*  
1101 69-85 (Springer, 1971).
- 1102 22 Morgan, T., Cobb, L., Short, F., Ross, R. & Gunn, D. in *Muscle metabolism during*  
1103 *exercise* 87-95 (Springer, 1971).
- 1104 23 Little, J. P. *et al.* Low-volume high-intensity interval training reduces hyperglycemia  
1105 and increases muscle mitochondrial capacity in patients with type 2 diabetes. *J. Appl.*  
1106 *Physiol.* **111**, 1554-1560, doi:10.1152/jappphysiol.00921.2011 (2011).
- 1107 24 Tonkonogi, M. & Sahlin, K. Rate of oxidative phosphorylation in isolated  
1108 mitochondria from human skeletal muscle: Effect of training status. *Acta Physiol.*  
1109 *Scand.* **161**, 345-353 (1997).
- 1110 25 Meinild Lundby, A. K. *et al.* Exercise training increases skeletal muscle  
1111 mitochondrial volume density by enlargement of existing mitochondria and not de  
1112 novo biogenesis. *Acta Physiol* **222**, e12905, doi:10.1111/apha.12905 (2018).
- 1113 26 Schägger, H. & Pfeiffer, K. Supercomplexes in the respiratory chains of yeast and  
1114 mammalian mitochondria. *The EMBO journal* **19**, 1777-1783 (2000).
- 1115 27 Lapuente-Brun, E. *et al.* Supercomplex assembly determines electron flux in the  
1116 mitochondrial electron transport chain. *Science* **340**, 1567-1570 (2013).
- 1117 28 Hirst, J. Open questions: respiratory chain supercomplexes—why are they there and  
1118 what do they do? *BMC Biol.* **16**, 111 (2018).
- 1119 29 Pillon, N. J. *et al.* Transcriptomic profiling of skeletal muscle adaptations to exercise  
1120 and inactivity. *Nature communications* **11**, 1-15 (2020).

- 1121 30 Calvo, S. E., Clauser, K. R. & Mootha, V. K. MitoCarta2.0: an updated inventory of  
1122 mammalian mitochondrial proteins. *Nucleic Acids Res.* **44**, D1251-1257,  
1123 doi:10.1093/nar/gkv1003 (2016).
- 1124 31 Egan, B. *et al.* 2-D DIGE analysis of the mitochondrial proteome from human skeletal  
1125 muscle reveals time course-dependent remodelling in response to 14 consecutive days  
1126 of endurance exercise training. *Proteomics* **11**, 1413-1428 (2011).
- 1127 32 Holloway, K. V. *et al.* Proteomic investigation of changes in human vastus lateralis  
1128 muscle in response to interval-exercise training. *Proteomics* **9**, 5155-5174 (2009).
- 1129 33 Hostrup, M., Onslev, J., Jacobson, G. A., Wilson, R. & Bangsbo, J. Chronic  $\beta$ 2-  
1130 adrenoceptor agonist treatment alters muscle proteome and functional adaptations  
1131 induced by high intensity training in young men. *The Journal of physiology* **596**, 231-  
1132 252 (2018).
- 1133 34 Robinson, M. M. *et al.* Enhanced protein translation underlies improved metabolic  
1134 and physical adaptations to different exercise training modes in young and old  
1135 humans. *Cell Metab.* **25**, 581-592 (2017).
- 1136 35 Ubaida-Mohien, C. *et al.* Physical activity associated proteomics of skeletal muscle:  
1137 being physically active in daily life may protect skeletal muscle from aging. *Front.*  
1138 *Physiol.* **10**, 312 (2019).
- 1139 36 Christensen, P. M. *et al.* A short period of high-intensity interval training improves  
1140 skeletal muscle mitochondrial function and pulmonary oxygen uptake kinetics. *J.*  
1141 *Appl. Physiol.* **120**, 1319-1327 (2016).
- 1142 37 Jacobs, R. A. *et al.* Improvements in exercise performance with high-intensity interval  
1143 training coincide with an increase in skeletal muscle mitochondrial content and  
1144 function. *J. Appl. Physiol.* **115**, 785-793, doi:10.1152/jappphysiol.00445.2013  
1145 (2013).
- 1146 38 Paradies, G., Paradies, V., De Benedictis, V., Ruggiero, F. M. & Petrosillo, G.  
1147 Functional role of cardiolipin in mitochondrial bioenergetics. *Biochimica et*  
1148 *Biophysica Acta (BBA)-Bioenergetics* **1837**, 408-417 (2014).
- 1149 39 Dube, J. *et al.* Effects of weight loss and exercise on insulin resistance, and  
1150 intramyocellular triacylglycerol, diacylglycerol and ceramide. *Diabetologia* **54**, 1147-  
1151 1156 (2011).
- 1152 40 Shepherd, S. *et al.* Lipid droplet remodelling and reduced muscle ceramides following  
1153 sprint interval and moderate-intensity continuous exercise training in obese males. *Int.*  
1154 *J. Obes.* **41**, 1745 (2017).
- 1155 41 Bruce, C. R. *et al.* Endurance training in obese humans improves glucose tolerance  
1156 and mitochondrial fatty acid oxidation and alters muscle lipid content. *American*  
1157 *Journal of Physiology - Endocrinology and Metabolism* **291**, E99-E107,  
1158 doi:10.1152/ajpendo.00587.2005 (2006).

- 1159 42 Perreault, L. *et al.* Intracellular localization of diacylglycerols and sphingolipids  
1160 influences insulin sensitivity and mitochondrial function in human skeletal muscle.  
1161 *JCI insight* **3** (2018).
- 1162 43 Goodpaster, B. H. & Kelley, D. E. Role of muscle in triglyceride metabolism. *Curr.*  
1163 *Opin. Lipidol.* **9**, 231-236 (1998).
- 1164 44 Walther, T. C. & Farese Jr, R. V. Lipid droplets and cellular lipid metabolism. *Annu.*  
1165 *Rev. Biochem.* **81**, 687-714 (2012).
- 1166 45 Benador, I. Y., Veliova, M., Liesa, M. & Shirihai, O. S. Mitochondria bound to lipid  
1167 droplets: where mitochondrial dynamics regulate lipid storage and utilization. *Cell*  
1168 *Metab.* **29**, 827-835 (2019).
- 1169 46 Wang, H. *et al.* Perilipin 5, a lipid droplet-associated protein, provides physical and  
1170 metabolic linkage to mitochondria. *J. Lipid Res.* **52**, 2159-2168 (2011).
- 1171 47 Palmieri, F. The mitochondrial transporter family SLC25: identification, properties  
1172 and physiopathology. *Mol. Aspects Med.* **34**, 465-484 (2013).
- 1173 48 Wang, Y. & Hekimi, S. Understanding ubiquinone. *Trends Cell Biol.* **26**, 367-378  
1174 (2016).
- 1175 49 Powers, S. K. *et al.* Exercise-induced oxidative stress: Friend or foe? *Journal of sport*  
1176 *and health science* (2020).
- 1177 50 LaHue, S. C., Comella, C. L. & Tanner, C. M. The best medicine? The influence of  
1178 physical activity and inactivity on Parkinson's disease. *Mov. Disord.* **31**, 1444-1454  
1179 (2016).
- 1180 51 McKenzie, M., Lazarou, M., Thorburn, D. R. & Ryan, M. T. Analysis of  
1181 mitochondrial subunit assembly into respiratory chain complexes using Blue Native  
1182 polyacrylamide gel electrophoresis. *Anal. Biochem.* **364**, 128-137,  
1183 doi:10.1016/j.ab.2007.02.022 (2007).
- 1184 52 Voos, W. Chaperone–protease networks in mitochondrial protein homeostasis.  
1185 *Biochimica et Biophysica Acta (BBA)-Molecular Cell Research* **1833**, 388-399  
1186 (2013).
- 1187 53 Wiedemann, N. & Pfanner, N. Mitochondrial machineries for protein import and  
1188 assembly. *Annu. Rev. Biochem.* **86**, 685-714 (2017).
- 1189 54 Gebert, N. *et al.* Mitochondrial cardiolipin involved in outer-membrane protein  
1190 biogenesis: implications for Barth syndrome. *Curr. Biol.* **19**, 2133-2139 (2009).
- 1191 55 Pfeiffer, K. *et al.* Cardiolipin stabilizes respiratory chain supercomplexes. *J. Biol.*  
1192 *Chem.* **278**, 52873-52880 (2003).
- 1193 56 Ikon, N. & Ryan, R. O. Cardiolipin and mitochondrial cristae organization.  
1194 *Biochimica et Biophysica Acta (BBA)-Biomembranes* **1859**, 1156-1163 (2017).

- 1195 57 Malhotra, A., Xu, Y., Ren, M. & Schlame, M. Formation of molecular species of  
1196 mitochondrial cardiolipin. 1. A novel transacylation mechanism to shuttle fatty acids  
1197 between sn-1 and sn-2 positions of multiple phospholipid species. *Biochimica et*  
1198 *Biophysica Acta (BBA)-Molecular and Cell Biology of Lipids* **1791**, 314-320 (2009).
- 1199 58 Wang, Y. & Hekimi, S. The complexity of making ubiquinone. *Trends Endocrinol.*  
1200 *Metab.* **30**, 929-943 (2019).
- 1201 59 Stefely, J. A. & Pagliarini, D. J. Biochemistry of mitochondrial coenzyme Q  
1202 biosynthesis. *Trends Biochem. Sci.* **42**, 824-843 (2017).
- 1203 60 Svensson, M. *et al.* Effect of Q10 supplementation on tissue Q10 levels and adenine  
1204 nucleotide catabolism during high-intensity exercise. *Int. J. Sport Nutr. Exerc. Metab.*  
1205 **9**, 166-180 (1999).
- 1206 61 Finocchiaro, G., Ito, M. & Tanaka, K. Purification and properties of short chain acyl-  
1207 CoA, medium chain acyl-CoA, and isovaleryl-CoA dehydrogenases from human  
1208 liver. *J. Biol. Chem.* **262**, 7982-7989 (1987).
- 1209 62 Xia, L., Björnstedt, M., Nordman, T., Eriksson, L. C. & Olsson, J. M. Reduction of  
1210 ubiquinone by lipoamide dehydrogenase: An antioxidant regenerating pathway. *Eur.*  
1211 *J. Biochem.* **268**, 1486-1490 (2001).
- 1212 63 Oldham, W. M., Clish, C. B., Yang, Y. & Loscalzo, J. Hypoxia-mediated increases in  
1213 L-2-hydroxyglutarate coordinate the metabolic response to reductive stress. *Cell*  
1214 *Metab.* **22**, 291-303 (2015).
- 1215 64 Huynen, M. A., Mühlmeister, M., Gotthardt, K., Guerrero-Castillo, S. & Brandt, U.  
1216 Evolution and structural organization of the mitochondrial contact site (MICOS)  
1217 complex and the mitochondrial intermembrane space bridging (MIB) complex.  
1218 *Biochimica et Biophysica Acta (BBA)-Molecular Cell Research* **1863**, 91-101 (2016).
- 1219 65 Guarani, V. *et al.* QIL1 is a novel mitochondrial protein required for MICOS complex  
1220 stability and cristae morphology. *Elife* **4**, e06265 (2015).
- 1221 66 Ehses, S. *et al.* Regulation of OPA1 processing and mitochondrial fusion by m-AAA  
1222 protease isoforms and OMA1. *J. Cell Biol.* **187**, 1023-1036 (2009).
- 1223 67 Frezza, C., Cipolat, S. & Scorrano, L. Organelle isolation: functional mitochondria  
1224 from mouse liver, muscle and cultured fibroblasts. *Nat. Protoc.* **2**, 287,  
1225 doi:10.1038/nprot.2006.478 (2007).
- 1226 68 Nielsen, J. *et al.* Plasticity in mitochondrial cristae density allows metabolic capacity  
1227 modulation in human skeletal muscle. *J. Physiol.* **595**, 2839-2847 (2017).
- 1228 69 Weber, T. A. *et al.* APOOL is a cardiolipin-binding constituent of the  
1229 Mitofilin/MINOS protein complex determining cristae morphology in mammalian  
1230 mitochondria. *PLoS One* **8**, e63683 (2013).
- 1231 70 Desler, C. *et al.* Is there a link between mitochondrial reserve respiratory capacity and  
1232 aging? *Journal of aging research* **2012** (2012).

- 1233 71 Booth, F. W., Gordon, S. E., Carlson, C. J. & Hamilton, M. T. Waging war on  
1234 modern chronic diseases: primary prevention through exercise biology. *J. Appl.*  
1235 *Physiol.* **88**, 774-787 (2000).
- 1236 72 Pedersen, B. K. & Saltin, B. Evidence for prescribing exercise as therapy in chronic  
1237 disease. *Scand. J. Med. Sci. Sports* **16**, 3-63 (2006).
- 1238 73 Bishop, D. J., Jenkins, D. G., McEniery, M. & Carey, M. F. Relationship between  
1239 plasma lactate parameters and muscle characteristics in female cyclists. *Med. Sci.*  
1240 *Sports Exerc.* **32**, 1088-1093 (2000).
- 1241 74 Jamnick, N. A., Botella, J., Pyne, D. B. & Bishop, D. J. Manipulating graded exercise  
1242 test variables affects the validity of the lactate threshold and  $\dot{V}O_2$  peak. *PLoS One*  
1243 **13**, e0199794 (2018).
- 1244 75 Baldwin, J., Snow, R. J. & Febbraio, M. A. Effect of training status and relative  
1245 exercise intensity on physiological responses in men. *Med. Sci. Sports Exerc.* **32**,  
1246 1648-1654 (2000).
- 1247 76 Frazier, A. E., Vincent, A. E., Turnbull, D. M., Thorburn, D. R. & Taylor, R. W. in  
1248 *Methods Cell Biol.* Vol. 155 121-156 (Elsevier, 2020).
- 1249 77 Granata, C., Oliveira, R. S. F., Little, J. P., Renner, K. & Bishop, D. J. Training  
1250 intensity modulates changes in PGC-1 $\alpha$  and p53 protein content and mitochondrial  
1251 respiration, but not markers of mitochondrial content in human skeletal muscle.  
1252 *FASEB J.* **30**, 959-970, doi:10.1096/fj.15-276907 (2016).
- 1253 78 Jha, P., Wang, X. & Auwerx, J. Analysis of Mitochondrial Respiratory Chain  
1254 Supercomplexes Using Blue Native Polyacrylamide Gel Electrophoresis (BN-PAGE).  
1255 *Curr. Protoc. Mouse Biol.*, 1-14 (2016).
- 1256 79 Ritchie, M. E. *et al.* limma powers differential expression analyses for RNA-  
1257 sequencing and microarray studies. *Nucleic Acids Res.* **43**, e47-e47 (2015).
- 1258 80 Eramo, M. J., Lisnyak, V., Formosa, L. E. & Ryan, M. T. The ‘mitochondrial contact  
1259 site and cristae organising system’ (MICOS) in health and human disease. *The Journal*  
1260 *of Biochemistry* **167**, 243-255 (2020).
- 1261 81 Martínez-Reyes, I. & Chandel, N. S. Mitochondrial TCA cycle metabolites control  
1262 physiology and disease. *Nature communications* **11**, 1-11 (2020).
- 1263 82 Hock, D. H., Robinson, D. R. & Stroud, D. A. Blackout in the powerhouse: clinical  
1264 phenotypes associated with defects in the assembly of OXPHOS complexes and the  
1265 mitoribosome. *Biochem. J.* **477**, 4085-4132 (2020).
- 1266 83 Chen, E. Y. *et al.* Enrichr: interactive and collaborative HTML5 gene list enrichment  
1267 analysis tool. *BMC Bioinformatics* **14**, 128 (2013).
- 1268 84 Kuleshov, M. V. *et al.* Enrichr: a comprehensive gene set enrichment analysis web  
1269 server 2016 update. *Nucleic Acids Res.* **44**, W90-W97 (2016).

- 1270 85 Stroud, D. A. *et al.* Accessory subunits are integral for assembly and function of  
1271 human mitochondrial complex I. *Nature* **538**, 123 (2016).
- 1272 86 Kulak, N. A., Pichler, G., Paron, I., Nagaraj, N. & Mann, M. Minimal, encapsulated  
1273 proteomic-sample processing applied to copy-number estimation in eukaryotic cells.  
1274 *Nature methods* **11**, 319 (2014).
- 1275 87 Cox, J. & Mann, M. MaxQuant enables high peptide identification rates,  
1276 individualized ppb-range mass accuracies and proteome-wide protein quantification.  
1277 *Nat. Biotechnol.* **26**, 1367-1372 (2008).
- 1278 88 Cox, J. *et al.* Andromeda: a peptide search engine integrated into the MaxQuant  
1279 environment. *J. Proteome Res.* **10**, 1794-1805 (2011).
- 1280 89 Lazar, C. imputeLCMD: A Collection of Methods for Left-Censored Missing Data  
1281 Imputation. R package, version 2.0.
- 1282 90 Kampjut, D. & Sazanov, L. A. Structure and mechanism of mitochondrial proton-  
1283 translocating transhydrogenase. *Nature* **573**, 291-295 (2019).
- 1284 91 Watmough, N. J. & Frerman, F. E. The electron transfer flavoprotein: ubiquinone  
1285 oxidoreductases. *Biochimica et Biophysica Acta (BBA)-Bioenergetics* **1797**, 1910-  
1286 1916 (2010).
- 1287 92 Schulz, H. Beta oxidation of fatty acids. *Biochimica et Biophysica Acta (BBA)-Lipids  
1288 and Lipid Metabolism* **1081**, 109-120 (1991).
- 1289 93 Mráček, T., Drahotka, Z. & Houštěk, J. The function and the role of the mitochondrial  
1290 glycerol-3-phosphate dehydrogenase in mammalian tissues. *Biochimica et Biophysica  
1291 Acta (BBA)-Bioenergetics* **1827**, 401-410 (2013).
- 1292 94 Takai, Y., Sasaki, T. & Matozaki, T. Small GTP-binding proteins. *Physiol. Rev.* **81**,  
1293 153-208 (2001).
- 1294 95 Fujikawa, M., Ohsakaya, S., Sugawara, K. & Yoshida, M. Population of ATP  
1295 synthase molecules in mitochondria is limited by available 6.8-kDa proteolipid  
1296 protein (MLQ). *Genes Cells* **19**, 153-160 (2014).
- 1297 96 Weir, J. M. *et al.* Plasma lipid profiling in a large population-based cohort. *J. Lipid  
1298 Res.* **54**, 2898-2908 (2013).
- 1299 97 Huynh, K. *et al.* High-throughput plasma lipidomics: detailed mapping of the  
1300 associations with cardiometabolic risk factors. *Cell chemical biology* **26**, 71-84. e74  
1301 (2019).
- 1302 98 Tan, S. M. *et al.* Complement C5a Induces Renal Injury in Diabetic Kidney Disease  
1303 by Disrupting Mitochondrial Metabolic Agility. *Diabetes* **69**, 83-98 (2020).
- 1304 99 Fahy, E., Cotter, D., Sud, M. & Subramaniam, S. Lipid classification, structures and  
1305 tools. *Biochimica et Biophysica Acta (BBA)-Molecular and Cell Biology of Lipids*  
1306 **1811**, 637-647 (2011).



1307 100 Motulsky, H. J. & Brown, R. E. Detecting outliers when fitting data with nonlinear  
1308 regression—a new method based on robust nonlinear regression and the false discovery  
1309 rate. *BMC Bioinformatics* 7, 123 (2006).

1310
